# Supplementary material for: Proteins that accumulate with age in human skeletal-muscle aggregates contribute to declines in muscle mass and function in Caenorhabditis elegans
Source: publisher site journal article supplement (doi:10.18632/aging.101141), 2016-12-15
Supplement: Supplementary file 1 [file aging-v8i12-101141-supplementary-material-SD1.xls]

## Sheet: muscle
Identified Proteins (713)	Accession Number	Molecular Weight	Lane 1	Lane 3	ratio	chi2 P (2-tailed FE)
Myosin light polypeptide 6 OS=Homo sapiens GN=MYL6 PE=1 SV=2	MYL6_HUMAN	17 kDa	0	27	#DIV/0!	5E–8
14-3-3 protein eta OS=Homo sapiens GN=YWHAH PE=1 SV=4	1433F_HUMAN	28 kDa	0	8	#DIV/0!	0.01
Isocitrate dehydrogenase [NADP] cytoplasmic OS=Homo sapiens GN=IDH1 PE=1 SV=2	IDHC_HUMAN	47 kDa	0	6	#DIV/0!	0.03
PDZ and LIM domain protein 1 OS=Homo sapiens GN=PDLIM1 PE=1 SV=4	PDLI1_HUMAN	36 kDa	0	6	#DIV/0!	0.03
Ig mu chain C region OS=Homo sapiens GN=IGHM PE=1 SV=3	IGHM_HUMAN	49 kDa	0	5	#DIV/0!	NS
Poly(rC)-binding protein 2 OS=Homo sapiens GN=PCBP2 PE=1 SV=1	PCBP2_HUMAN	39 kDa	0	5	#DIV/0!
Q96JB1-DECOY	Q96JB1-DECOY	?	0	5	#DIV/0!
Ubiquitin-conjugating enzyme E2 variant 1 OS=Homo sapiens GN=UBE2V1 PE=1 SV=2	UB2V1_HUMAN	16 kDa	0	4	#DIV/0!
Delta-1-pyrroline-5-carboxylate dehydrogenase, mitochondrial OS=Homo sapiens GN=ALDH4A1 PE=1 SV=3	AL4A1_HUMAN	62 kDa	0	4	#DIV/0!
Histone H1.2 OS=Homo sapiens GN=HIST1H1C PE=1 SV=2	H12_HUMAN	21 kDa	0	4	#DIV/0!
Ras GTPase-activating protein-binding protein 2 OS=Homo sapiens GN=G3BP2 PE=1 SV=2	G3BP2_HUMAN	54 kDa	0	4	#DIV/0!
Serine/threonine-protein phosphatase PP1-beta catalytic subunit OS=Homo sapiens GN=PPP1CB PE=1 SV=3	PP1B_HUMAN	37 kDa	0	4	#DIV/0!
Cluster of Erlin-1 OS=Homo sapiens GN=ERLIN1 PE=1 SV=1 (ERLN1_HUMAN)	ERLN1_HUMAN	39 kDa	0	3	#DIV/0!
Cluster of Erlin-1 OS=Homo sapiens GN=ERLIN1 PE=1 SV=1 (ERLN1_HUMAN)	ERLN1_HUMAN	39 kDa	0	3	#DIV/0!
Haptoglobin-related protein OS=Homo sapiens GN=HPR PE=1 SV=2	HPTR_HUMAN (+1)	39 kDa	0	3	#DIV/0!
NADH dehydrogenase [ubiquinone] 1 alpha subcomplex subunit 9, mitochondrial OS=Homo sapiens GN=NDUFA9 PE=1 SV=2	NDUA9_HUMAN	43 kDa	0	3	#DIV/0!
Peptidyl-prolyl cis-trans isomerase-like 3 OS=Homo sapiens GN=PPIL3 PE=1 SV=1	PPIL3_HUMAN	18 kDa	0	3	#DIV/0!
Q99996-DECOY	Q99996-DECOY	?	0	3	#DIV/0!
Rho GDP-dissociation inhibitor 1 OS=Homo sapiens GN=ARHGDIA PE=1 SV=3	GDIR1_HUMAN	23 kDa	0	3	#DIV/0!
40S ribosomal protein S19 OS=Homo sapiens GN=RPS19 PE=1 SV=2	RS19_HUMAN	16 kDa	0	2	#DIV/0!
40S ribosomal protein S25 OS=Homo sapiens GN=RPS25 PE=1 SV=1	RS25_HUMAN	14 kDa	0	2	#DIV/0!
60S ribosomal protein L37a OS=Homo sapiens GN=RPL37A PE=1 SV=2	RL37A_HUMAN	10 kDa	0	2	#DIV/0!
Calpain small subunit 1 OS=Homo sapiens GN=CAPNS1 PE=1 SV=1	CPNS1_HUMAN	28 kDa	0	2	#DIV/0!
Deoxyribonucleoside 5'-monophosphate N-glycosidase OS=Homo sapiens GN=RCL PE=1 SV=1	RCL_HUMAN	19 kDa	0	2	#DIV/0!
Dolichyl-diphosphooligosaccharide--protein glycosyltransferase subunit DAD1 OS=Homo sapiens GN=DAD1 PE=1 SV=3	DAD1_HUMAN	12 kDa	0	2	#DIV/0!
Dual specificity mitogen-activated protein kinase kinase 6 OS=Homo sapiens GN=MAP2K6 PE=1 SV=1	MP2K6_HUMAN	37 kDa	0	2	#DIV/0!
Ferritin light chain OS=Homo sapiens GN=FTL PE=1 SV=2	FRIL_HUMAN	20 kDa	0	2	#DIV/0!
Growth factor receptor-bound protein 2 OS=Homo sapiens GN=GRB2 PE=1 SV=1	GRB2_HUMAN	25 kDa	0	2	#DIV/0!
Iron-sulfur cluster assembly 2 homolog, mitochondrial OS=Homo sapiens GN=ISCA2 PE=1 SV=2	ISCA2_HUMAN	16 kDa	0	2	#DIV/0!
Laminin subunit beta-1 OS=Homo sapiens GN=LAMB1 PE=1 SV=1	LAMB1_HUMAN	198 kDa	0	2	#DIV/0!
Metallothionein-1E OS=Homo sapiens GN=MT1E PE=1 SV=1	MT1E_HUMAN (+4)	6 kDa	0	2	#DIV/0!
NADH dehydrogenase [ubiquinone] 1 beta subcomplex subunit 8, mitochondrial OS=Homo sapiens GN=NDUFB8 PE=1 SV=1	NDUB8_HUMAN	22 kDa	0	2	#DIV/0!
Proteasome subunit alpha type-6 OS=Homo sapiens GN=PSMA6 PE=1 SV=1	PSA6_HUMAN	27 kDa	0	2	#DIV/0!
Protein-cysteine N-palmitoyltransferase HHAT-like protein OS=Homo sapiens GN=HHATL PE=2 SV=1	HHATL_HUMAN	57 kDa	0	2	#DIV/0!
Ribose-phosphate pyrophosphokinase 1 OS=Homo sapiens GN=PRPS1 PE=1 SV=2	PRPS1_HUMAN	35 kDa	0	2	#DIV/0!
Serum amyloid P-component OS=Homo sapiens GN=APCS PE=1 SV=2	SAMP_HUMAN	25 kDa	0	2	#DIV/0!
SH3 domain-binding glutamic acid-rich protein OS=Homo sapiens GN=SH3BGR PE=1 SV=3	SH3BG_HUMAN	26 kDa	0	2	#DIV/0!
Thiosulfate sulfurtransferase/rhodanese-like domain-containing protein 1 OS=Homo sapiens GN=TSTD1 PE=1 SV=3	TSTD1_HUMAN	13 kDa	0	2	#DIV/0!
Trimeric intracellular cation channel type A OS=Homo sapiens GN=TMEM38A PE=1 SV=1	TM38A_HUMAN	33 kDa	0	2	#DIV/0!
Myozenin-2 OS=Homo sapiens GN=MYOZ2 PE=1 SV=1	MYOZ2_HUMAN	30 kDa	1	21	21	1e-05
Annexin A2 OS=Homo sapiens GN=ANXA2 PE=1 SV=2	ANXA2_HUMAN	39 kDa	1	12	12	0.003
Calsequestrin-2 OS=Homo sapiens GN=CASQ2 PE=1 SV=2	CASQ2_HUMAN	46 kDa	1	11	11	0.004
Adenylosuccinate synthetase isozyme 1 OS=Homo sapiens GN=ADSSL1 PE=1 SV=1	PURA1_HUMAN	50 kDa	2	17	8.5	0.0007
Ig lambda chain C regions OS=Homo sapiens GN=IGLC1 PE=1 SV=1	LAC_HUMAN	11 kDa	1	7	7
PDZ and LIM domain protein 7 OS=Homo sapiens GN=PDLIM7 PE=1 SV=1	PDLI7_HUMAN	50 kDa	1	7	7
Fibrinogen beta chain OS=Homo sapiens GN=FGB PE=1 SV=2	FIBB_HUMAN	56 kDa	1	6	6
Nidogen-2 OS=Homo sapiens GN=NID2 PE=1 SV=3	NID2_HUMAN	151 kDa	1	6	6
GTP:AMP phosphotransferase mitochondrial OS=Homo sapiens GN=AK3 PE=1 SV=4	KAD3_HUMAN	26 kDa	2	10	5	0.04
Cluster of Ubiquitin-conjugating enzyme E2 variant 2 OS=Homo sapiens GN=UBE2V2 PE=1 SV=4 (UB2V2_HUMAN)	UB2V2_HUMAN [2]	16 kDa	1	5	5
GTP-binding nuclear protein Ran OS=Homo sapiens GN=RAN PE=1 SV=3	RAN_HUMAN	24 kDa	1	5	5
Guanine nucleotide-binding protein subunit beta-2-like 1 OS=Homo sapiens GN=GNB2L1 PE=1 SV=3	GBLP_HUMAN	35 kDa	1	5	5
Mitochondrial fission 1 protein OS=Homo sapiens GN=FIS1 PE=1 SV=2	FIS1_HUMAN	17 kDa	1	5	5
Amine oxidase [flavin-containing] B OS=Homo sapiens GN=MAOB PE=1 SV=3	AOFB_HUMAN	59 kDa	2	8	4
Electron transfer flavoprotein subunit beta OS=Homo sapiens GN=ETFB PE=1 SV=3	ETFB_HUMAN	28 kDa	2	8	4
Glutathione S-transferase omega-1 OS=Homo sapiens GN=GSTO1 PE=1 SV=2	GSTO1_HUMAN	28 kDa	2	8	4
Heterogeneous nuclear ribonucleoproteins A2/B1 OS=Homo sapiens GN=HNRNPA2B1 PE=1 SV=2	ROA2_HUMAN	37 kDa	2	8	4
Small muscular protein OS=Homo sapiens GN=SMPX PE=2 SV=3	SMPX_HUMAN	10 kDa	2	8	4
ADP-ribosylation factor 1 OS=Homo sapiens GN=ARF1 PE=1 SV=2	ARF1_HUMAN (+1)	21 kDa	1	4	4
Ubiquitin-conjugating enzyme E2 variant 2 OS=Homo sapiens GN=UBE2V2 PE=1 SV=4	UB2V2_HUMAN	16 kDa	1	4	4
Annexin A5 OS=Homo sapiens GN=ANXA5 PE=1 SV=2	ANXA5_HUMAN	36 kDa	1	4	4
ATP synthase subunit delta, mitochondrial OS=Homo sapiens GN=ATP5D PE=1 SV=2	ATPD_HUMAN	17 kDa	1	4	4
Histone H1.0 OS=Homo sapiens GN=H1F0 PE=1 SV=3	H10_HUMAN	21 kDa	1	4	4
NADH dehydrogenase [ubiquinone] iron-sulfur protein 2, mitochondrial OS=Homo sapiens GN=NDUFS2 PE=1 SV=2	NDUS2_HUMAN	53 kDa	1	4	4
S-formylglutathione hydrolase OS=Homo sapiens GN=ESD PE=1 SV=2	ESTD_HUMAN	31 kDa	1	4	4
Tubulointerstitial nephritis antigen-like OS=Homo sapiens GN=TINAGL1 PE=1 SV=1	TINAL_HUMAN	52 kDa	1	4	4
14-3-3 protein zeta/delta OS=Homo sapiens GN=YWHAZ PE=1 SV=1	1433Z_HUMAN	28 kDa	3	11	3.66667	0.04
L-lactate dehydrogenase B chain OS=Homo sapiens GN=LDHB PE=1 SV=2	LDHB_HUMAN	37 kDa	8	28	3.5	0.001
Glutathione S-transferase P OS=Homo sapiens GN=GSTP1 PE=1 SV=2	GSTP1_HUMAN	23 kDa	4	14	3.5	0.003
ES1 protein homolog, mitochondrial OS=Homo sapiens GN=C21orf33 PE=1 SV=3	ES1_HUMAN	28 kDa	2	7	3.5
Thioredoxin-dependent peroxide reductase, mitochondrial OS=Homo sapiens GN=PRDX3 PE=1 SV=3	PRDX3_HUMAN	28 kDa	2	7	3.5
Cluster of Histone H2A type 1-H OS=Homo sapiens GN=HIST1H2AH PE=1 SV=3 (H2A1H_HUMAN)	H2A1H_HUMAN [7]	14 kDa	6	20	3.33333	0.01
Troponin T, slow skeletal muscle OS=Homo sapiens GN=TNNT1 PE=1 SV=4	TNNT1_HUMAN	33 kDa	38	125	3.28947	4e-09
Histone H3.3 OS=Homo sapiens GN=H3F3A PE=1 SV=2	H33_HUMAN	15 kDa	5	16	3.2	0.03
Histone H2A type 1-H OS=Homo sapiens GN=HIST1H2AH PE=1 SV=3	H2A1H_HUMAN (+5)	14 kDa	6	19	3.16667	0.02
Histone H2A type 1-C OS=Homo sapiens GN=HIST1H2AC PE=1 SV=3	H2A1C_HUMAN	14 kDa	6	18	3	0.02
Lactoylglutathione lyase OS=Homo sapiens GN=GLO1 PE=1 SV=4	LGUL_HUMAN	21 kDa	4	12	3	0.05
L-xylulose reductase OS=Homo sapiens GN=DCXR PE=1 SV=2	DCXR_HUMAN	26 kDa	2	6	3
NADH dehydrogenase [ubiquinone] iron-sulfur protein 3, mitochondrial OS=Homo sapiens GN=NDUFS3 PE=1 SV=1	NDUS3_HUMAN	30 kDa	2	6	3
Acyl carrier protein, mitochondrial OS=Homo sapiens GN=NDUFAB1 PE=1 SV=3	ACPM_HUMAN	17 kDa	1	3	3
A-kinase anchor protein 13 OS=Homo sapiens GN=AKAP13 PE=1 SV=2	AKP13_HUMAN	308 kDa	1	3	3
Calmodulin-like protein 5 OS=Homo sapiens GN=CALML5 PE=1 SV=2	CALL5_HUMAN	16 kDa	1	3	3
CD59 glycoprotein OS=Homo sapiens GN=CD59 PE=1 SV=1	CD59_HUMAN	14 kDa	1	3	3
Dihydropyrimidinase-related protein 3 OS=Homo sapiens GN=DPYSL3 PE=1 SV=1	DPYL3_HUMAN	62 kDa	1	3	3
Heat shock protein beta-3 OS=Homo sapiens GN=HSPB3 PE=2 SV=2	HSPB3_HUMAN	17 kDa	1	3	3
Macrophage migration inhibitory factor OS=Homo sapiens GN=MIF PE=1 SV=4	MIF_HUMAN	12 kDa	1	3	3
Mimecan OS=Homo sapiens GN=OGN PE=1 SV=1	MIME_HUMAN	34 kDa	1	3	3
Myopalladin OS=Homo sapiens GN=MYPN PE=1 SV=2	MYPN_HUMAN	145 kDa	1	3	3
NADH dehydrogenase [ubiquinone] 1 beta subcomplex subunit 11, mitochondrial OS=Homo sapiens GN=NDUFB11 PE=1 SV=1	NDUBB_HUMAN	17 kDa	1	3	3
NADH-cytochrome b5 reductase 3 OS=Homo sapiens GN=CYB5R3 PE=1 SV=3	NB5R3_HUMAN	34 kDa	1	3	3
P07951-DECOY	P07951-DECOY	?	1	3	3
Proactivator polypeptide OS=Homo sapiens GN=PSAP PE=1 SV=2	SAP_HUMAN	58 kDa	1	3	3
Proteasome subunit alpha type-7 OS=Homo sapiens GN=PSMA7 PE=1 SV=1	PSA7_HUMAN	28 kDa	1	3	3
Selenoprotein W OS=Homo sapiens GN=SEPW1 PE=2 SV=3	SELW_HUMAN	9 kDa	1	3	3
Vesicle-associated membrane protein 3 OS=Homo sapiens GN=VAMP3 PE=1 SV=3	VAMP3_HUMAN	11 kDa	1	3	3
Phosphatidylethanolamine-binding protein 1 OS=Homo sapiens GN=PEBP1 PE=1 SV=3	PEBP1_HUMAN	21 kDa	15	41	2.73333	0.001
Creatine kinase B-type OS=Homo sapiens GN=CKB PE=1 SV=1	KCRB_HUMAN	43 kDa	3	8	2.66667
Cluster of Amine oxidase [flavin-containing] B OS=Homo sapiens GN=MAOB PE=1 SV=3 (AOFB_HUMAN)	AOFB_HUMAN	59 kDa	3	8	2.66667
Histone H2A.V OS=Homo sapiens GN=H2AFV PE=1 SV=3	H2AV_HUMAN (+1)	14 kDa	5	13	2.6
Hemoglobin subunit gamma-1 OS=Homo sapiens GN=HBG1 PE=1 SV=2	HBG1_HUMAN	16 kDa	7	18	2.57143	0.04
Protein NipSnap homolog 2 OS=Homo sapiens GN=GBAS PE=1 SV=1	NIPS2_HUMAN	34 kDa	7	18	2.57143	0.04
Ferritin heavy chain OS=Homo sapiens GN=FTH1 PE=1 SV=2	FRIH_HUMAN	21 kDa	8	20	2.5	0.04
Elongation factor 1-alpha 2 OS=Homo sapiens GN=EEF1A2 PE=1 SV=1	EF1A2_HUMAN	50 kDa	4	10	2.5
Medium-chain specific acyl-CoA dehydrogenase, mitochondrial OS=Homo sapiens GN=ACADM PE=1 SV=1	ACADM_HUMAN	47 kDa	4	10	2.5
40S ribosomal protein S12 OS=Homo sapiens GN=RPS12 PE=1 SV=3	RS12_HUMAN	15 kDa	2	5	2.5
Cluster of ADP-ribosylation factor 1 OS=Homo sapiens GN=ARF1 PE=1 SV=2 (ARF1_HUMAN)	ARF1_HUMAN [3]	21 kDa	2	5	2.5
Collagen alpha-2(VI) chain OS=Homo sapiens GN=COL6A2 PE=1 SV=4	CO6A2_HUMAN	109 kDa	2	5	2.5
Heat shock protein beta-2 OS=Homo sapiens GN=HSPB2 PE=1 SV=2	HSPB2_HUMAN	20 kDa	2	5	2.5
O76041-DECOY	O76041-DECOY	?	2	5	2.5
Peptidyl-prolyl cis-trans isomerase A OS=Homo sapiens GN=PPIA PE=1 SV=2	PPIA_HUMAN	18 kDa	11	27	2.45455	0.02
LIM and cysteine-rich domains protein 1 OS=Homo sapiens GN=LMCD1 PE=1 SV=1	LMCD1_HUMAN	41 kDa	12	29	2.41667	0.02
Troponin I, slow skeletal muscle OS=Homo sapiens GN=TNNI1 PE=1 SV=3	TNNI1_HUMAN	22 kDa	65	157	2.41538	4e-07
Protein-L-isoaspartate(D-aspartate) O-methyltransferase OS=Homo sapiens GN=PCMT1 PE=1 SV=3	PIMT_HUMAN	25 kDa	5	12	2.4
Myosin regulatory light chain 2, ventricular/cardiac muscle isoform OS=Homo sapiens GN=MYL2 PE=1 SV=3	MLRV_HUMAN	19 kDa	69	165	2.3913	4e-07
Citrate synthase, mitochondrial OS=Homo sapiens GN=CS PE=1 SV=2	CISY_HUMAN	52 kDa	6	14	2.33333
F-actin-capping protein subunit beta OS=Homo sapiens GN=CAPZB PE=1 SV=4	CAPZB_HUMAN	31 kDa	6	14	2.33333
NADH dehydrogenase [ubiquinone] 1 alpha subcomplex subunit 12 OS=Homo sapiens GN=NDUFA12 PE=1 SV=1	NDUAC_HUMAN	17 kDa	3	7	2.33333
Troponin C, slow skeletal and cardiac muscles OS=Homo sapiens GN=TNNC1 PE=1 SV=1	TNNC1_HUMAN	18 kDa	33	76	2.30303	0.0003
Acetyl-CoA acetyltransferase, mitochondrial OS=Homo sapiens GN=ACAT1 PE=1 SV=1	THIL_HUMAN	45 kDa	14	32	2.28571	0.02
14-3-3 protein epsilon OS=Homo sapiens GN=YWHAE PE=1 SV=1	1433E_HUMAN	29 kDa	11	25	2.27273	0.04
Superoxide dismutase [Mn], mitochondrial OS=Homo sapiens GN=SOD2 PE=1 SV=2	SODM_HUMAN	25 kDa	4	9	2.25
Cofilin-2 OS=Homo sapiens GN=CFL2 PE=1 SV=1	COF2_HUMAN	19 kDa	15	33	2.2	0.02
Pyruvate dehydrogenase E1 component subunit beta, mitochondrial OS=Homo sapiens GN=PDHB PE=1 SV=3	ODPB_HUMAN	39 kDa	5	11	2.2
Ubiquitin-conjugating enzyme E2 N OS=Homo sapiens GN=UBE2N PE=1 SV=1	UBE2N_HUMAN	17 kDa	5	11	2.2
Hemoglobin subunit alpha OS=Homo sapiens GN=HBA1 PE=1 SV=2	HBA_HUMAN	15 kDa	47	103	2.19149	0.0001
Glutathione S-transferase Mu 2 OS=Homo sapiens GN=GSTM2 PE=1 SV=2	GSTM2_HUMAN	26 kDa	12	26	2.16667	0.05
Peroxiredoxin-2 OS=Homo sapiens GN=PRDX2 PE=1 SV=5	PRDX2_HUMAN	22 kDa	12	26	2.16667	0.05
Protein DJ-1 OS=Homo sapiens GN=PARK7 PE=1 SV=2	PARK7_HUMAN	20 kDa	14	30	2.14286	0.03
Hemoglobin subunit beta OS=Homo sapiens GN=HBB PE=1 SV=2	HBB_HUMAN	16 kDa	59	122	2.0678	0.0001
Histone H4 OS=Homo sapiens GN=HIST1H4A PE=1 SV=2	H4_HUMAN	11 kDa	15	31	2.06667	0.03
Galectin-1 OS=Homo sapiens GN=LGALS1 PE=1 SV=2	LEG1_HUMAN	15 kDa	16	33	2.0625	0.03
Heat shock protein beta-6 OS=Homo sapiens GN=HSPB6 PE=1 SV=2	HSPB6_HUMAN	17 kDa	20	41	2.05	0.02
Cluster of Hemoglobin subunit beta OS=Homo sapiens GN=HBB PE=1 SV=2 (HBB_HUMAN)	HBB_HUMAN [2]	16 kDa	68	136	2	0.0001
Hemoglobin subunit delta OS=Homo sapiens GN=HBD PE=1 SV=2	HBD_HUMAN	16 kDa	40	80	2	0.002
Fatty acid-binding protein, heart OS=Homo sapiens GN=FABP3 PE=1 SV=4	FABPH_HUMAN	15 kDa	17	34	2	0.03
Myosin-15 OS=Homo sapiens GN=MYH15 PE=1 SV=5	MYH15_HUMAN	225 kDa	14	28	2	0.04
Cluster of Glutathione S-transferase Mu 2 OS=Homo sapiens GN=GSTM2 PE=1 SV=2 (GSTM2_HUMAN)	GSTM2_HUMAN [2]	26 kDa	13	26	2	0.05
Cofilin-1 OS=Homo sapiens GN=CFL1 PE=1 SV=3	COF1_HUMAN	19 kDa	10	20	2
Carbonic anhydrase 1 OS=Homo sapiens GN=CA1 PE=1 SV=2	CAH1_HUMAN	29 kDa	7	14	2
Poly(rC)-binding protein 1 OS=Homo sapiens GN=PCBP1 PE=1 SV=2	PCBP1_HUMAN	37 kDa	6	12	2
2-oxoglutarate dehydrogenase, mitochondrial OS=Homo sapiens GN=OGDH PE=1 SV=3	ODO1_HUMAN	116 kDa	5	10	2
Glycerol-3-phosphate dehydrogenase 1-like protein OS=Homo sapiens GN=GPD1L PE=1 SV=1	GPD1L_HUMAN	38 kDa	5	10	2
Translationally-controlled tumor protein OS=Homo sapiens GN=TPT1 PE=1 SV=1	TCTP_HUMAN	20 kDa	5	10	2
NADH dehydrogenase [ubiquinone] 1 alpha subcomplex subunit 6 OS=Homo sapiens GN=NDUFA6 PE=1 SV=2	NDUA6_HUMAN	15 kDa	4	8	2
Pyruvate dehydrogenase E1 component subunit alpha, somatic form, mitochondrial OS=Homo sapiens GN=PDHA1 PE=1 SV=3	ODPA_HUMAN	43 kDa	4	8	2
Succinate dehydrogenase [ubiquinone] iron-sulfur subunit, mitochondrial OS=Homo sapiens GN=SDHB PE=1 SV=3	DHSB_HUMAN	32 kDa	4	8	2
Nucleoside diphosphate kinase B OS=Homo sapiens GN=NME2 PE=1 SV=1	NDKB_HUMAN	17 kDa	3	6	2
Cluster of Nucleoside diphosphate kinase B OS=Homo sapiens GN=NME2 PE=1 SV=1 (NDKB_HUMAN)	NDKB_HUMAN	17 kDa	3	6	2
Isopentenyl-diphosphate Delta-isomerase 2 OS=Homo sapiens GN=IDI2 PE=1 SV=1	IDI2_HUMAN	27 kDa	3	6	2
3-ketoacyl-CoA thiolase, mitochondrial OS=Homo sapiens GN=ACAA2 PE=1 SV=2	THIM_HUMAN	42 kDa	2	4	2
Coiled-coil-helix-coiled-coil-helix domain-containing protein 3, mitochondrial OS=Homo sapiens GN=CHCHD3 PE=1 SV=1	CHCH3_HUMAN	26 kDa	2	4	2
DNA-binding protein A OS=Homo sapiens GN=CSDA PE=1 SV=4	DBPA_HUMAN	40 kDa	2	4	2
Glutathione S-transferase theta-1 OS=Homo sapiens GN=GSTT1 PE=1 SV=4	GSTT1_HUMAN	27 kDa	2	4	2
GTP-binding protein SAR1b OS=Homo sapiens GN=SAR1B PE=1 SV=1	SAR1B_HUMAN	22 kDa	2	4	2
Leucine-rich repeat-containing protein 20 OS=Homo sapiens GN=LRRC20 PE=2 SV=1	LRC20_HUMAN	21 kDa	2	4	2
NEDD8 OS=Homo sapiens GN=NEDD8 PE=1 SV=1	NEDD8_HUMAN	9 kDa	2	4	2
O75110-DECOY	O75110-DECOY	?	2	4	2
Selenium-binding protein 1 OS=Homo sapiens GN=SELENBP1 PE=1 SV=2	SBP1_HUMAN	52 kDa	2	4	2
Succinyl-CoA ligase [GDP-forming] subunit alpha, mitochondrial OS=Homo sapiens GN=SUCLG1 PE=1 SV=4	SUCA_HUMAN	36 kDa	2	4	2
ADP-ribosylation factor 4 OS=Homo sapiens GN=ARF4 PE=1 SV=3	ARF4_HUMAN	21 kDa	1	2	2
40S ribosomal protein S13 OS=Homo sapiens GN=RPS13 PE=1 SV=2	RS13_HUMAN	17 kDa	1	2	2
40S ribosomal protein S16 OS=Homo sapiens GN=RPS16 PE=1 SV=2	RS16_HUMAN	16 kDa	1	2	2
60S ribosomal protein L8 OS=Homo sapiens GN=RPL8 PE=1 SV=2	RL8_HUMAN	28 kDa	1	2	2
Aldehyde dehydrogenase, mitochondrial OS=Homo sapiens GN=ALDH2 PE=1 SV=2	ALDH2_HUMAN	56 kDa	1	2	2
Annexin A7 OS=Homo sapiens GN=ANXA7 PE=1 SV=3	ANXA7_HUMAN	53 kDa	1	2	2
Aspartyl/asparaginyl beta-hydroxylase OS=Homo sapiens GN=ASPH PE=1 SV=3	ASPH_HUMAN	86 kDa	1	2	2
Bcl-2-like protein 13 OS=Homo sapiens GN=BCL2L13 PE=1 SV=1	B2L13_HUMAN	53 kDa	1	2	2
Calcium-binding protein 39 OS=Homo sapiens GN=CAB39 PE=1 SV=1	CAB39_HUMAN	40 kDa	1	2	2
Cytochrome c oxidase subunit 8A, mitochondrial OS=Homo sapiens GN=COX8A PE=1 SV=2	COX8A_HUMAN	8 kDa	1	2	2
Eukaryotic translation initiation factor 3 subunit K OS=Homo sapiens GN=EIF3K PE=1 SV=1	EIF3K_HUMAN	25 kDa	1	2	2
Fatty acid-binding protein, adipocyte OS=Homo sapiens GN=FABP4 PE=1 SV=3	FABP4_HUMAN	15 kDa	1	2	2
Fibrinogen gamma chain OS=Homo sapiens GN=FGG PE=1 SV=3	FIBG_HUMAN	52 kDa	1	2	2
FUN14 domain-containing protein 2 OS=Homo sapiens GN=FUNDC2 PE=1 SV=2	FUND2_HUMAN	21 kDa	1	2	2
Glycine cleavage system H protein, mitochondrial OS=Homo sapiens GN=GCSH PE=1 SV=1	GCSH_HUMAN	19 kDa	1	2	2
Heme-binding protein 2 OS=Homo sapiens GN=HEBP2 PE=1 SV=1	HEBP2_HUMAN	23 kDa	1	2	2
Hydroxyacyl-coenzyme A dehydrogenase, mitochondrial OS=Homo sapiens GN=HADH PE=1 SV=2	HCDH_HUMAN	34 kDa	1	2	2
Lumican OS=Homo sapiens GN=LUM PE=1 SV=2	LUM_HUMAN	38 kDa	1	2	2
Myotrophin OS=Homo sapiens GN=MTPN PE=1 SV=2	MTPN_HUMAN	13 kDa	1	2	2
NADH dehydrogenase [ubiquinone] 1 alpha subcomplex subunit 11 OS=Homo sapiens GN=NDUFA11 PE=1 SV=3	NDUAB_HUMAN	15 kDa	1	2	2
NADH dehydrogenase [ubiquinone] 1 alpha subcomplex subunit 8 OS=Homo sapiens GN=NDUFA8 PE=1 SV=3	NDUA8_HUMAN	20 kDa	1	2	2
NADH dehydrogenase [ubiquinone] 1 beta subcomplex subunit 5, mitochondrial OS=Homo sapiens GN=NDUFB5 PE=1 SV=1	NDUB5_HUMAN	22 kDa	1	2	2
NADH dehydrogenase [ubiquinone] iron-sulfur protein 4, mitochondrial OS=Homo sapiens GN=NDUFS4 PE=1 SV=1	NDUS4_HUMAN	20 kDa	1	2	2
NEDD8-conjugating enzyme Ubc12 OS=Homo sapiens GN=UBE2M PE=1 SV=1	UBC12_HUMAN	21 kDa	1	2	2
Protein S100-A4 OS=Homo sapiens GN=S100A4 PE=1 SV=1	S10A4_HUMAN	12 kDa	1	2	2
Putative 40S ribosomal protein S26-like 1 OS=Homo sapiens GN=RPS26P11 PE=5 SV=1	RS26L_HUMAN (+1)	13 kDa	1	2	2
Putative high mobility group protein B1-like 1 OS=Homo sapiens GN=HMGB1L1 PE=5 SV=1	HGB1A_HUMAN (+2)	24 kDa	1	2	2
Q9Y4I1-DECOY	Q9Y4I1-DECOY	?	1	2	2
Ras-related protein Rab-13 OS=Homo sapiens GN=RAB13 PE=1 SV=1	RAB13_HUMAN	23 kDa	1	2	2
Ubiquitin thioesterase OTUB1 OS=Homo sapiens GN=OTUB1 PE=1 SV=2	OTUB1_HUMAN	31 kDa	1	2	2
Vesicle-associated membrane protein-associated protein B/C OS=Homo sapiens GN=VAPB PE=1 SV=3	VAPB_HUMAN	27 kDa	1	2	2
Myosin light chain 3 OS=Homo sapiens GN=MYL3 PE=1 SV=3	MYL3_HUMAN	22 kDa	80	158	1.975	0.0001
Myosin light chain 6B OS=Homo sapiens GN=MYL6B PE=1 SV=1	MYL6B_HUMAN	23 kDa	20	39	1.95	0.03
ATP synthase subunit O, mitochondrial OS=Homo sapiens GN=ATP5O PE=1 SV=1	ATPO_HUMAN	23 kDa	10	19	1.9
Superoxide dismutase [Cu-Zn] OS=Homo sapiens GN=SOD1 PE=1 SV=2	SODC_HUMAN	16 kDa	9	17	1.88889
14 kDa phosphohistidine phosphatase OS=Homo sapiens GN=PHPT1 PE=1 SV=1	PHP14_HUMAN	14 kDa	8	15	1.875
Cluster of Histone H2B type 1-D OS=Homo sapiens GN=HIST1H2BD PE=1 SV=2 (H2B1D_HUMAN)	H2B1D_HUMAN	14 kDa	13	24	1.84615
Histone H2B type 1-D OS=Homo sapiens GN=HIST1H2BD PE=1 SV=2	H2B1D_HUMAN	14 kDa	12	22	1.83333
Synaptopodin-2 OS=Homo sapiens GN=SYNPO2 PE=1 SV=2	SYNP2_HUMAN	118 kDa	11	20	1.81818
Cytochrome c1, heme protein, mitochondrial OS=Homo sapiens GN=CYC1 PE=1 SV=2	CY1_HUMAN	35 kDa	5	9	1.8
Electron transfer flavoprotein subunit alpha, mitochondrial OS=Homo sapiens GN=ETFA PE=1 SV=1	ETFA_HUMAN	35 kDa	5	9	1.8
Cluster of Isocitrate dehydrogenase [NADP], mitochondrial OS=Homo sapiens GN=IDH2 PE=1 SV=2 (IDHP_HUMAN)	IDHP_HUMAN [2]	51 kDa	53	95	1.79245	0.004
Peptidyl-prolyl cis-trans isomerase FKBP1A OS=Homo sapiens GN=FKBP1A PE=1 SV=2	FKB1A_HUMAN	12 kDa	4	7	1.75
Ryanodine receptor 1 OS=Homo sapiens GN=RYR1 PE=1 SV=3	RYR1_HUMAN	565 kDa	4	7	1.75
Isocitrate dehydrogenase [NADP], mitochondrial OS=Homo sapiens GN=IDH2 PE=1 SV=2	IDHP_HUMAN	51 kDa	53	92	1.73585	0.005
UPF0366 protein C11orf67 OS=Homo sapiens GN=C11orf67 PE=1 SV=1	CK067_HUMAN	13 kDa	11	19	1.72727
Hydroxyacylglutathione hydrolase, mitochondrial OS=Homo sapiens GN=HAGH PE=1 SV=2	GLO2_HUMAN	34 kDa	7	12	1.71429
Myoglobin OS=Homo sapiens GN=MB PE=1 SV=2	MYG_HUMAN	17 kDa	342	579	1.69298	0.0001
Cluster of 14-3-3 protein gamma OS=Homo sapiens GN=YWHAG PE=1 SV=2 (1433G_HUMAN)	1433G_HUMAN [4]	28 kDa	28	47	1.67857	0.05
Malate dehydrogenase, cytoplasmic OS=Homo sapiens GN=MDH1 PE=1 SV=4	MDHC_HUMAN	36 kDa	28	47	1.67857	0.05
Delta(3,5)-Delta(2,4)-dienoyl-CoA isomerase, mitochondrial OS=Homo sapiens GN=ECH1 PE=1 SV=2	ECH1_HUMAN	36 kDa	6	10	1.66667
10 kDa heat shock protein, mitochondrial OS=Homo sapiens GN=HSPE1 PE=1 SV=2	CH10_HUMAN	11 kDa	3	5	1.66667
40S ribosomal protein S20 OS=Homo sapiens GN=RPS20 PE=1 SV=1	RS20_HUMAN	13 kDa	3	5	1.66667
Cytochrome c oxidase subunit 7A1, mitochondrial OS=Homo sapiens GN=COX7A1 PE=1 SV=2	CX7A1_HUMAN	9 kDa	3	5	1.66667
Heterogeneous nuclear ribonucleoprotein A1 OS=Homo sapiens GN=HNRNPA1 PE=1 SV=5	ROA1_HUMAN	39 kDa	3	5	1.66667
NADH dehydrogenase [ubiquinone] 1 beta subcomplex subunit 9 OS=Homo sapiens GN=NDUFB9 PE=1 SV=3	NDUB9_HUMAN	22 kDa	3	5	1.66667
NADH dehydrogenase [ubiquinone] 1 subunit C2 OS=Homo sapiens GN=NDUFC2 PE=1 SV=1	NDUC2_HUMAN	14 kDa	3	5	1.66667
Peroxiredoxin-5, mitochondrial OS=Homo sapiens GN=PRDX5 PE=1 SV=3	PRDX5_HUMAN	22 kDa	3	5	1.66667
Ubiquitin-like modifier-activating enzyme 1 OS=Homo sapiens GN=UBA1 PE=1 SV=3	UBA1_HUMAN	118 kDa	3	5	1.66667
14-3-3 protein gamma OS=Homo sapiens GN=YWHAG PE=1 SV=2	1433G_HUMAN	28 kDa	23	38	1.65217
PDZ and LIM domain protein 5 OS=Homo sapiens GN=PDLIM5 PE=1 SV=4	PDLI5_HUMAN	64 kDa	58	95	1.63793	0.02
Cytochrome c OS=Homo sapiens GN=CYCS PE=1 SV=2	CYC_HUMAN	12 kDa	19	31	1.63158
Serum albumin OS=Homo sapiens GN=ALB PE=1 SV=2	ALBU_HUMAN	69 kDa	105	170	1.61905	0.003
Flavin reductase OS=Homo sapiens GN=BLVRB PE=1 SV=3	BLVRB_HUMAN	22 kDa	13	21	1.61538
Carbonic anhydrase 3 OS=Homo sapiens GN=CA3 PE=1 SV=3	CAH3_HUMAN	30 kDa	147	237	1.61224	0.001
Vimentin OS=Homo sapiens GN=VIM PE=1 SV=4	VIME_HUMAN	54 kDa	15	24	1.6
Telethonin OS=Homo sapiens GN=TCAP PE=1 SV=1	TELT_HUMAN	19 kDa	7	11	1.57143
Tropomyosin alpha-3 chain OS=Homo sapiens GN=TPM3 PE=1 SV=1	TPM3_HUMAN	33 kDa	214	329	1.53738	0.001
Aldose reductase OS=Homo sapiens GN=AKR1B1 PE=1 SV=3	ALDR_HUMAN	36 kDa	14	21	1.5
Carboxymethylenebutenolidase homolog OS=Homo sapiens GN=CMBL PE=1 SV=1	CMBL_HUMAN	28 kDa	8	12	1.5
Keratin, type I cytoskeletal 17 OS=Homo sapiens GN=KRT17 PE=1 SV=2	K1C17_HUMAN	48 kDa	6	9	1.5
Ig kappa chain C region OS=Homo sapiens GN=IGKC PE=1 SV=1	IGKC_HUMAN	12 kDa	6	9	1.5
3,2-trans-enoyl-CoA isomerase, mitochondrial OS=Homo sapiens GN=DCI PE=1 SV=1	D3D2_HUMAN	33 kDa	4	6	1.5
Enoyl-CoA hydratase, mitochondrial OS=Homo sapiens GN=ECHS1 PE=1 SV=4	ECHM_HUMAN	31 kDa	4	6	1.5
Puromycin-sensitive aminopeptidase OS=Homo sapiens GN=NPEPPS PE=1 SV=2	PSA_HUMAN	103 kDa	4	6	1.5
Serotransferrin OS=Homo sapiens GN=TF PE=1 SV=2	TRFE_HUMAN	77 kDa	4	6	1.5
Transcription elongation factor B polypeptide 1 OS=Homo sapiens GN=TCEB1 PE=1 SV=1	ELOC_HUMAN	12 kDa	4	6	1.5
40S ribosomal protein S18 OS=Homo sapiens GN=RPS18 PE=1 SV=3	RS18_HUMAN	18 kDa	2	3	1.5
60 kDa heat shock protein, mitochondrial OS=Homo sapiens GN=HSPD1 PE=1 SV=2	CH60_HUMAN	61 kDa	2	3	1.5
60S ribosomal protein L23 OS=Homo sapiens GN=RPL23 PE=1 SV=1	RL23_HUMAN	15 kDa	2	3	1.5
ATP synthase subunit epsilon-like protein, mitochondrial OS=Homo sapiens GN=ATP5EP2 PE=1 SV=1	AT5EL_HUMAN (+1)	6 kDa	2	3	1.5
Cathepsin D OS=Homo sapiens GN=CTSD PE=1 SV=1	CATD_HUMAN	45 kDa	2	3	1.5
Cytochrome b-c1 complex subunit 9 OS=Homo sapiens GN=UQCR10 PE=1 SV=3	QCR9_HUMAN	7 kDa	2	3	1.5
Glycogenin-1 OS=Homo sapiens GN=GYG1 PE=1 SV=4	GLYG_HUMAN	39 kDa	2	3	1.5
Inosine-5'-monophosphate dehydrogenase 2 OS=Homo sapiens GN=IMPDH2 PE=1 SV=2	IMDH2_HUMAN	56 kDa	2	3	1.5
Low molecular weight phosphotyrosine protein phosphatase OS=Homo sapiens GN=ACP1 PE=1 SV=3	PPAC_HUMAN	18 kDa	2	3	1.5
NADH dehydrogenase [ubiquinone] 1 alpha subcomplex subunit 3 OS=Homo sapiens GN=NDUFA3 PE=1 SV=1	NDUA3_HUMAN	9 kDa	2	3	1.5
NADH dehydrogenase [ubiquinone] 1 alpha subcomplex subunit 4 OS=Homo sapiens GN=NDUFA4 PE=1 SV=1	NDUA4_HUMAN	9 kDa	2	3	1.5
NADH dehydrogenase [ubiquinone] flavoprotein 3, mitochondrial OS=Homo sapiens GN=NDUFV3 PE=1 SV=2	NDUV3_HUMAN	12 kDa	2	3	1.5
P43004-DECOY	P43004-DECOY	?	2	3	1.5
Peptidyl-prolyl cis-trans isomerase NIMA-interacting 1 OS=Homo sapiens GN=PIN1 PE=1 SV=1	PIN1_HUMAN	18 kDa	2	3	1.5
Prohibitin OS=Homo sapiens GN=PHB PE=1 SV=1	PHB_HUMAN	30 kDa	2	3	1.5
Proteasome subunit beta type-6 OS=Homo sapiens GN=PSMB6 PE=1 SV=4	PSB6_HUMAN	25 kDa	2	3	1.5
Protein-arginine deiminase type-2 OS=Homo sapiens GN=PADI2 PE=1 SV=2	PADI2_HUMAN	76 kDa	2	3	1.5
Short-chain specific acyl-CoA dehydrogenase, mitochondrial OS=Homo sapiens GN=ACADS PE=1 SV=1	ACADS_HUMAN	44 kDa	2	3	1.5
Transforming protein RhoA OS=Homo sapiens GN=RHOA PE=1 SV=1	RHOA_HUMAN	22 kDa	2	3	1.5
Ubiquinone biosynthesis protein COQ7 homolog OS=Homo sapiens GN=COQ7 PE=1 SV=2	COQ7_HUMAN	24 kDa	2	3	1.5
Cytochrome c oxidase subunit 4 isoform 1, mitochondrial OS=Homo sapiens GN=COX4I1 PE=1 SV=1	COX41_HUMAN	20 kDa	15	22	1.46667
Trifunctional enzyme subunit alpha, mitochondrial OS=Homo sapiens GN=HADHA PE=1 SV=2	ECHA_HUMAN	83 kDa	11	16	1.45455
Probable C->U-editing enzyme APOBEC-2 OS=Homo sapiens GN=APOBEC2 PE=1 SV=1	ABEC2_HUMAN	26 kDa	20	29	1.45
ATP synthase subunit b, mitochondrial OS=Homo sapiens GN=ATP5F1 PE=1 SV=2	AT5F1_HUMAN	29 kDa	9	13	1.44444
Cytochrome c oxidase subunit 6B1 OS=Homo sapiens GN=COX6B1 PE=1 SV=2	CX6B1_HUMAN	10 kDa	9	13	1.44444
SET and MYND domain-containing protein 1 OS=Homo sapiens GN=SMYD1 PE=2 SV=1	SMYD1_HUMAN	57 kDa	9	13	1.44444
Xin actin-binding repeat-containing protein 1 OS=Homo sapiens GN=XIRP1 PE=1 SV=1	XIRP1_HUMAN	199 kDa	9	13	1.44444
Malate dehydrogenase, mitochondrial OS=Homo sapiens GN=MDH2 PE=1 SV=3	MDHM_HUMAN	36 kDa	16	23	1.4375
NADH dehydrogenase [ubiquinone] 1 alpha subcomplex subunit 13 OS=Homo sapiens GN=NDUFA13 PE=1 SV=3	NDUAD_HUMAN	17 kDa	7	10	1.42857
NADH dehydrogenase [ubiquinone] 1 beta subcomplex subunit 4 OS=Homo sapiens GN=NDUFB4 PE=1 SV=3	NDUB4_HUMAN	15 kDa	7	10	1.42857
Calsequestrin-1 OS=Homo sapiens GN=CASQ1 PE=1 SV=2	CASQ1_HUMAN	44 kDa	61	87	1.42623
Voltage-dependent anion-selective channel protein 3 OS=Homo sapiens GN=VDAC3 PE=1 SV=1	VDAC3_HUMAN	31 kDa	15	21	1.4
Histidine triad nucleotide-binding protein 1 OS=Homo sapiens GN=HINT1 PE=1 SV=2	HINT1_HUMAN	14 kDa	5	7	1.4
Myosin light chain kinase 2, skeletal/cardiac muscle OS=Homo sapiens GN=MYLK2 PE=1 SV=3	MYLK2_HUMAN	65 kDa	5	7	1.4
Profilin-1 OS=Homo sapiens GN=PFN1 PE=1 SV=2	PROF1_HUMAN	15 kDa	5	7	1.4
Adenylate kinase isoenzyme 1 OS=Homo sapiens GN=AK1 PE=1 SV=3	KAD1_HUMAN	22 kDa	43	60	1.39535
ATP synthase subunit beta, mitochondrial OS=Homo sapiens GN=ATP5B PE=1 SV=3	ATPB_HUMAN	57 kDa	88	120	1.36364
Collagen alpha-1(VI) chain OS=Homo sapiens GN=COL6A1 PE=1 SV=3	CO6A1_HUMAN	109 kDa	11	15	1.36364
Heat shock protein beta-1 OS=Homo sapiens GN=HSPB1 PE=1 SV=2	HSPB1_HUMAN	23 kDa	62	84	1.35484
Triosephosphate isomerase OS=Homo sapiens GN=TPI1 PE=1 SV=2	TPIS_HUMAN	27 kDa	63	85	1.34921
Carbonic anhydrase 2 OS=Homo sapiens GN=CA2 PE=1 SV=2	CAH2_HUMAN	29 kDa	21	28	1.33333
Peroxiredoxin-1 OS=Homo sapiens GN=PRDX1 PE=1 SV=1	PRDX1_HUMAN	22 kDa	18	24	1.33333
14-3-3 protein beta/alpha OS=Homo sapiens GN=YWHAB PE=1 SV=3	1433B_HUMAN	28 kDa	9	12	1.33333
Calmodulin OS=Homo sapiens GN=CALM1 PE=1 SV=2	CALM_HUMAN	17 kDa	6	8	1.33333
28S ribosomal protein S36, mitochondrial OS=Homo sapiens GN=MRPS36 PE=1 SV=2	RT36_HUMAN	11 kDa	3	4	1.33333
60S ribosomal protein L35a OS=Homo sapiens GN=RPL35A PE=1 SV=2	RL35A_HUMAN	13 kDa	3	4	1.33333
Dual specificity protein phosphatase 3 OS=Homo sapiens GN=DUSP3 PE=1 SV=1	DUS3_HUMAN	20 kDa	3	4	1.33333
Dynein light chain 2, cytoplasmic OS=Homo sapiens GN=DYNLL2 PE=1 SV=1	DYL2_HUMAN	10 kDa	3	4	1.33333
Elongation factor 1-delta OS=Homo sapiens GN=EEF1D PE=1 SV=5	EF1D_HUMAN	31 kDa	3	4	1.33333
Hsc70-interacting protein OS=Homo sapiens GN=ST13 PE=1 SV=2	F10A1_HUMAN (+1)	41 kDa	3	4	1.33333
Neuroblast differentiation-associated protein AHNAK OS=Homo sapiens GN=AHNAK PE=1 SV=2	AHNK_HUMAN	629 kDa	3	4	1.33333
Pyruvate dehydrogenase protein X component, mitochondrial OS=Homo sapiens GN=PDHX PE=1 SV=3	ODPX_HUMAN	54 kDa	3	4	1.33333
Q96K76-DECOY	Q96K76-DECOY	?	3	4	1.33333
Cluster of Phosphoglycerate mutase 2 OS=Homo sapiens GN=PGAM2 PE=1 SV=3 (PGAM2_HUMAN)	PGAM2_HUMAN	29 kDa	58	77	1.32759
Glycerol-3-phosphate dehydrogenase [NAD+], cytoplasmic OS=Homo sapiens GN=GPD1 PE=1 SV=4	GPDA_HUMAN	38 kDa	16	21	1.3125
Phosphoglycerate mutase 2 OS=Homo sapiens GN=PGAM2 PE=1 SV=3	PGAM2_HUMAN	29 kDa	58	76	1.31034
Four and a half LIM domains protein 1 OS=Homo sapiens GN=FHL1 PE=1 SV=4	FHL1_HUMAN	36 kDa	110	143	1.3
Tripartite motif-containing protein 72 OS=Homo sapiens GN=TRIM72 PE=1 SV=2	TRI72_HUMAN	53 kDa	25	32	1.28
NADH-cytochrome b5 reductase 1 OS=Homo sapiens GN=CYB5R1 PE=1 SV=1	NB5R1_HUMAN	34 kDa	19	24	1.26316
Myosin-7 OS=Homo sapiens GN=MYH7 PE=1 SV=5	MYH7_HUMAN	223 kDa	1750	2197	1.25543	<0.0001
Cluster of Keratin, type I cytoskeletal 10 OS=Homo sapiens GN=KRT10 PE=1 SV=6 (K1C10_HUMAN)	K1C10_HUMAN [3]	59 kDa	36	45	1.25
Collagen alpha-3(VI) chain OS=Homo sapiens GN=COL6A3 PE=1 SV=4	CO6A3_HUMAN	344 kDa	32	40	1.25
2,4-dienoyl-CoA reductase, mitochondrial OS=Homo sapiens GN=DECR1 PE=1 SV=1	DECR_HUMAN	36 kDa	4	5	1.25
Cystatin-B OS=Homo sapiens GN=CSTB PE=1 SV=2	CYTB_HUMAN	11 kDa	4	5	1.25
Cytochrome c oxidase subunit 5A, mitochondrial OS=Homo sapiens GN=COX5A PE=1 SV=2	COX5A_HUMAN	17 kDa	4	5	1.25
Profilin-2 OS=Homo sapiens GN=PFN2 PE=1 SV=3	PROF2_HUMAN	15 kDa	4	5	1.25
Alpha-enolase OS=Homo sapiens GN=ENO1 PE=1 SV=2	ENOA_HUMAN	47 kDa	31	38	1.22581
Cluster of AMP deaminase 1 OS=Homo sapiens GN=AMPD1 PE=1 SV=1 (AMPD1_HUMAN)	AMPD1_HUMAN	86 kDa	36	44	1.22222
Heat shock protein beta-7 OS=Homo sapiens GN=HSPB7 PE=1 SV=1	HSPB7_HUMAN	19 kDa	18	22	1.22222
Myozenin-1 OS=Homo sapiens GN=MYOZ1 PE=1 SV=1	MYOZ1_HUMAN	32 kDa	55	67	1.21818
ATP synthase subunit alpha, mitochondrial OS=Homo sapiens GN=ATP5A1 PE=1 SV=1	ATPA_HUMAN	60 kDa	79	96	1.21519
Myosin-6 OS=Homo sapiens GN=MYH6 PE=1 SV=4	MYH6_HUMAN	224 kDa	1101	1332	1.20981	0.0001
Alpha-crystallin B chain OS=Homo sapiens GN=CRYAB PE=1 SV=2	CRYAB_HUMAN	20 kDa	92	111	1.20652
Chaperone activity of bc1 complex-like, mitochondrial OS=Homo sapiens GN=CABC1 PE=1 SV=1	ADCK3_HUMAN	72 kDa	5	6	1.2
Perilipin-4 OS=Homo sapiens GN=PLIN4 PE=2 SV=2	PLIN4_HUMAN	134 kDa	5	6	1.2
Fructose-bisphosphate aldolase C OS=Homo sapiens GN=ALDOC PE=1 SV=2	ALDOC_HUMAN	39 kDa	41	49	1.19512
AMP deaminase 1 OS=Homo sapiens GN=AMPD1 PE=1 SV=1	AMPD1_HUMAN	86 kDa	36	43	1.19444
Keratin, type I cytoskeletal 10 OS=Homo sapiens GN=KRT10 PE=1 SV=6	K1C10_HUMAN	59 kDa	33	39	1.18182
Peroxiredoxin-6 OS=Homo sapiens GN=PRDX6 PE=1 SV=3	PRDX6_HUMAN	25 kDa	34	40	1.17647
Tropomyosin beta chain OS=Homo sapiens GN=TPM2 PE=1 SV=1	TPM2_HUMAN	33 kDa	328	385	1.17378	0.04
Cluster of Actin, alpha skeletal muscle OS=Homo sapiens GN=ACTA1 PE=1 SV=1 (ACTS_HUMAN)	ACTS_HUMAN [3]	42 kDa	764	892	1.16754	0.02
Cytochrome b-c1 complex subunit 8 OS=Homo sapiens GN=UQCRQ PE=1 SV=4	QCR8_HUMAN	10 kDa	6	7	1.16667
Elongation factor 1-gamma OS=Homo sapiens GN=EEF1G PE=1 SV=3	EF1G_HUMAN	50 kDa	6	7	1.16667
Elongation factor 2 OS=Homo sapiens GN=EEF2 PE=1 SV=4	EF2_HUMAN	95 kDa	6	7	1.16667
Myotilin OS=Homo sapiens GN=MYOT PE=1 SV=1	MYOTI_HUMAN	55 kDa	95	110	1.15789
Actin, alpha skeletal muscle OS=Homo sapiens GN=ACTA1 PE=1 SV=1	ACTS_HUMAN	42 kDa	758	875	1.15435	0.02
Glucose-6-phosphate isomerase OS=Homo sapiens GN=GPI PE=1 SV=4	G6PI_HUMAN	63 kDa	33	38	1.15152
Sarcoplasmic/endoplasmic reticulum calcium ATPase 2 OS=Homo sapiens GN=ATP2A2 PE=1 SV=1	AT2A2_HUMAN	115 kDa	130	148	1.13846
Heat shock cognate 71 kDa protein OS=Homo sapiens GN=HSPA8 PE=1 SV=1	HSP7C_HUMAN	71 kDa	65	74	1.13846
Voltage-dependent anion-selective channel protein 2 OS=Homo sapiens GN=VDAC2 PE=1 SV=2	VDAC2_HUMAN	32 kDa	23	26	1.13043
Laminin subunit alpha-2 OS=Homo sapiens GN=LAMA2 PE=1 SV=4	LAMA2_HUMAN	344 kDa	16	18	1.125
Ig gamma-1 chain C region OS=Homo sapiens GN=IGHG1 PE=1 SV=1	IGHG1_HUMAN	36 kDa	8	9	1.125
Aspartate aminotransferase, cytoplasmic OS=Homo sapiens GN=GOT1 PE=1 SV=3	AATC_HUMAN	46 kDa	25	28	1.12
Ankyrin repeat domain-containing protein 2 OS=Homo sapiens GN=ANKRD2 PE=1 SV=3	ANKR2_HUMAN	40 kDa	9	10	1.11111
Cardiac phospholamban OS=Homo sapiens GN=PLN PE=1 SV=1	PPLA_HUMAN	6 kDa	9	10	1.11111
Fumarate hydratase, mitochondrial OS=Homo sapiens GN=FH PE=1 SV=3	FUMH_HUMAN	55 kDa	10	11	1.1
NADH dehydrogenase [ubiquinone] 1 alpha subcomplex subunit 7 OS=Homo sapiens GN=NDUFA7 PE=1 SV=3	NDUA7_HUMAN	13 kDa	10	11	1.1
Very long-chain specific acyl-CoA dehydrogenase, mitochondrial OS=Homo sapiens GN=ACADVL PE=1 SV=1	ACADV_HUMAN	70 kDa	22	24	1.09091
Myosin light chain 4 OS=Homo sapiens GN=MYL4 PE=1 SV=3	MYL4_HUMAN	22 kDa	12	13	1.08333
Alpha-actinin-1 OS=Homo sapiens GN=ACTN1 PE=1 SV=2	ACTN1_HUMAN	103 kDa	141	152	1.07801
LIM domain-binding protein 3 OS=Homo sapiens GN=LDB3 PE=1 SV=2	LDB3_HUMAN	77 kDa	103	111	1.07767
Ubiquitin OS=Homo sapiens GN=RPS27A PE=1 SV=1	UBIQ_HUMAN	9 kDa	26	28	1.07692
Cytochrome b-c1 complex subunit 2, mitochondrial OS=Homo sapiens GN=UQCRC2 PE=1 SV=3	QCR2_HUMAN	48 kDa	40	43	1.075
Tubulin beta-2C chain OS=Homo sapiens GN=TUBB2C PE=1 SV=1	TBB2C_HUMAN	50 kDa	32	34	1.0625
Mitochondrial 2-oxoglutarate/malate carrier protein OS=Homo sapiens GN=SLC25A11 PE=1 SV=3	M2OM_HUMAN	34 kDa	17	18	1.05882
Voltage-dependent anion-selective channel protein 1 OS=Homo sapiens GN=VDAC1 PE=1 SV=2	VDAC1_HUMAN	31 kDa	35	37	1.05714
Heat shock 70 kDa protein 1A/1B OS=Homo sapiens GN=HSPA1A PE=1 SV=5	HSP71_HUMAN	70 kDa	54	57	1.05556
Cluster of Heat shock 70 kDa protein 1A/1B OS=Homo sapiens GN=HSPA1A PE=1 SV=5 (HSP71_HUMAN)	HSP71_HUMAN	70 kDa	57	60	1.05263
Actin, cytoplasmic 1 OS=Homo sapiens GN=ACTB PE=1 SV=1	ACTB_HUMAN (+1)	42 kDa	384	403	1.04948
L-lactate dehydrogenase A chain OS=Homo sapiens GN=LDHA PE=1 SV=2	LDHA_HUMAN	37 kDa	53	55	1.03774
Heat shock-related 70 kDa protein 2 OS=Homo sapiens GN=HSPA2 PE=1 SV=1	HSP72_HUMAN	70 kDa	59	61	1.0339
Alpha-actinin-2 OS=Homo sapiens GN=ACTN2 PE=1 SV=1	ACTN2_HUMAN	104 kDa	430	444	1.03256
Tubulin beta chain OS=Homo sapiens GN=TUBB PE=1 SV=2	TBB5_HUMAN	50 kDa	32	33	1.03125
Cysteine and glycine-rich protein 3 OS=Homo sapiens GN=CSRP3 PE=1 SV=1	CSRP3_HUMAN	21 kDa	33	34	1.0303
Cluster of Tubulin beta-2C chain OS=Homo sapiens GN=TUBB2C PE=1 SV=1 (TBB2C_HUMAN)	TBB2C_HUMAN [2]	50 kDa	38	39	1.02632
Myosin light chain 1/3, skeletal muscle isoform OS=Homo sapiens GN=MYL1 PE=1 SV=3	MYL1_HUMAN	21 kDa	154	156	1.01299
Myosin-7B OS=Homo sapiens GN=MYH7B PE=2 SV=2	MYH7B_HUMAN	221 kDa	164	165	1.0061
Myosin-binding protein C, slow-type OS=Homo sapiens GN=MYBPC1 PE=1 SV=2	MYPC1_HUMAN	128 kDa	206	207	1.00485
PDZ and LIM domain protein 3 OS=Homo sapiens GN=PDLIM3 PE=2 SV=1	PDLI3_HUMAN	39 kDa	113	113	1
Trifunctional enzyme subunit beta, mitochondrial OS=Homo sapiens GN=HADHB PE=1 SV=3	ECHB_HUMAN	51 kDa	23	23	1
Cytochrome b-c1 complex subunit 1, mitochondrial OS=Homo sapiens GN=UQCRC1 PE=1 SV=3	QCR1_HUMAN	53 kDa	21	21	1
Keratin, type I cytoskeletal 16 OS=Homo sapiens GN=KRT16 PE=1 SV=4	K1C16_HUMAN	51 kDa	16	16	1
Tubulin alpha-1A chain OS=Homo sapiens GN=TUBA1A PE=1 SV=1	TBA1A_HUMAN (+2)	50 kDa	16	16	1
ATP synthase subunit gamma, mitochondrial OS=Homo sapiens GN=ATP5C1 PE=1 SV=1	ATPG_HUMAN	33 kDa	10	10	1
Acylphosphatase-2 OS=Homo sapiens GN=ACYP2 PE=1 SV=2	ACYP2_HUMAN	11 kDa	9	9	1
Cluster of Ig gamma-1 chain C region OS=Homo sapiens GN=IGHG1 PE=1 SV=1 (IGHG1_HUMAN)	IGHG1_HUMAN [3]	36 kDa	9	9	1
F-actin-capping protein subunit alpha-2 OS=Homo sapiens GN=CAPZA2 PE=1 SV=3	CAZA2_HUMAN	33 kDa	9	9	1
Hornerin OS=Homo sapiens GN=HRNR PE=1 SV=2	HORN_HUMAN	282 kDa	9	9	1
NADH dehydrogenase [ubiquinone] flavoprotein 1, mitochondrial OS=Homo sapiens GN=NDUFV1 PE=1 SV=4	NDUV1_HUMAN	51 kDa	9	9	1
BAG family molecular chaperone regulator 3 OS=Homo sapiens GN=BAG3 PE=1 SV=3	BAG3_HUMAN	62 kDa	8	8	1
NADH-ubiquinone oxidoreductase 75 kDa subunit, mitochondrial OS=Homo sapiens GN=NDUFS1 PE=1 SV=3	NDUS1_HUMAN	79 kDa	20	16	0.8
Sarcalumenin OS=Homo sapiens GN=SRL PE=2 SV=2	SRCA_HUMAN	101 kDa	15	12	0.8
Synaptopodin 2-like protein OS=Homo sapiens GN=SYNPO2L PE=2 SV=3	SYP2L_HUMAN	102 kDa	10	8	0.8
NAD(P) transhydrogenase, mitochondrial OS=Homo sapiens GN=NNT PE=1 SV=3	NNTM_HUMAN	114 kDa	5	4	0.8
NADH dehydrogenase [ubiquinone] 1 alpha subcomplex subunit 5 OS=Homo sapiens GN=NDUFA5 PE=1 SV=3	NDUA5_HUMAN	13 kDa	5	4	0.8
Thioredoxin OS=Homo sapiens GN=TXN PE=1 SV=3	THIO_HUMAN	12 kDa	5	4	0.8
Keratin, type II cytoskeletal 5 OS=Homo sapiens GN=KRT5 PE=1 SV=3	K2C5_HUMAN	62 kDa	14	11	0.785714
Myosin-13 OS=Homo sapiens GN=MYH13 PE=1 SV=1	MYH13_HUMAN	224 kDa	501	392	0.782435	0.0004
Synemin OS=Homo sapiens GN=SYNM PE=1 SV=2	SYNEM_HUMAN	173 kDa	32	25	0.78125
Pyruvate kinase isozymes M1/M2 OS=Homo sapiens GN=PKM2 PE=1 SV=4	KPYM_HUMAN	58 kDa	100	76	0.76
Cluster of Pyruvate kinase isozymes M1/M2 OS=Homo sapiens GN=PKM2 PE=1 SV=4 (KPYM_HUMAN)	KPYM_HUMAN	58 kDa	100	76	0.76
Cluster of Keratin, type II cytoskeletal 2 epidermal OS=Homo sapiens GN=KRT2 PE=1 SV=2 (K22E_HUMAN)	K22E_HUMAN [3]	65 kDa	64	48	0.75
Heat shock protein HSP 90-beta OS=Homo sapiens GN=HSP90AB1 PE=1 SV=4	HS90B_HUMAN	83 kDa	24	18	0.75
Myc box-dependent-interacting protein 1 OS=Homo sapiens GN=BIN1 PE=1 SV=1	BIN1_HUMAN	65 kDa	16	12	0.75
Calcium-binding mitochondrial carrier protein Aralar1 OS=Homo sapiens GN=SLC25A12 PE=1 SV=2	CMC1_HUMAN	75 kDa	12	9	0.75
Q8WZ42-DECOY	Q8WZ42-DECOY	?	8	6	0.75
40S ribosomal protein S14 OS=Homo sapiens GN=RPS14 PE=1 SV=3	RS14_HUMAN	16 kDa	4	3	0.75
60S ribosomal protein L12 OS=Homo sapiens GN=RPL12 PE=1 SV=1	RL12_HUMAN	18 kDa	4	3	0.75
ATP synthase protein 8 OS=Homo sapiens GN=MT-ATP8 PE=1 SV=1	ATP8_HUMAN	8 kDa	4	3	0.75
cAMP-dependent protein kinase catalytic subunit alpha OS=Homo sapiens GN=PRKACA PE=1 SV=2	KAPCA_HUMAN	41 kDa	4	3	0.75
Glutathione S-transferase Mu 3 OS=Homo sapiens GN=GSTM3 PE=1 SV=3	GSTM3_HUMAN	27 kDa	4	3	0.75
Nidogen-1 OS=Homo sapiens GN=NID1 PE=1 SV=3	NID1_HUMAN	136 kDa	4	3	0.75
Peptidyl-prolyl cis-trans isomerase FKBP3 OS=Homo sapiens GN=FKBP3 PE=1 SV=1	FKBP3_HUMAN	25 kDa	4	3	0.75
Myomesin-3 OS=Homo sapiens GN=MYOM3 PE=2 SV=1	MYOM3_HUMAN	162 kDa	47	35	0.744681
Myosin-3 OS=Homo sapiens GN=MYH3 PE=1 SV=3	MYH3_HUMAN	224 kDa	687	505	0.73508	0.0001
Keratin, type II cytoskeletal 2 epidermal OS=Homo sapiens GN=KRT2 PE=1 SV=2	K22E_HUMAN	65 kDa	49	36	0.734694
Heat shock protein HSP 90-alpha OS=Homo sapiens GN=HSP90AA1 PE=1 SV=5	HS90A_HUMAN	85 kDa	26	19	0.730769
Four and a half LIM domains protein 3 OS=Homo sapiens GN=FHL3 PE=1 SV=4	FHL3_HUMAN	31 kDa	22	16	0.727273
Musculoskeletal embryonic nuclear protein 1 OS=Homo sapiens GN=MUSTN1 PE=2 SV=2	MSTN1_HUMAN	9 kDa	11	8	0.727273
Protein disulfide-isomerase OS=Homo sapiens GN=P4HB PE=1 SV=3	PDIA1_HUMAN	57 kDa	7	5	0.714286
Q13509-DECOY	Q13509-DECOY	?	7	5	0.714286
Myosin-8 OS=Homo sapiens GN=MYH8 PE=1 SV=3	MYH8_HUMAN	223 kDa	1096	760	0.693431	0.0001
Cluster of Heat shock protein HSP 90-alpha OS=Homo sapiens GN=HSP90AA1 PE=1 SV=5 (HS90A_HUMAN)	HS90A_HUMAN [2]	85 kDa	38	26	0.684211
Laminin subunit gamma-1 OS=Homo sapiens GN=LAMC1 PE=1 SV=3	LAMC1_HUMAN	178 kDa	25	17	0.68
Acyl-CoA-binding protein OS=Homo sapiens GN=DBI PE=1 SV=2	ACBP_HUMAN	10 kDa	9	6	0.666667
Gelsolin OS=Homo sapiens GN=GSN PE=1 SV=1	GELS_HUMAN	86 kDa	9	6	0.666667
Stress-70 protein, mitochondrial OS=Homo sapiens GN=HSPA9 PE=1 SV=2	GRP75_HUMAN	74 kDa	9	6	0.666667
Long-chain-fatty-acid--CoA ligase 1 OS=Homo sapiens GN=ACSL1 PE=1 SV=1	ACSL1_HUMAN	78 kDa	3	2	0.666667
NADH dehydrogenase [ubiquinone] iron-sulfur protein 5 OS=Homo sapiens GN=NDUFS5 PE=1 SV=3	NDUS5_HUMAN	13 kDa	3	2	0.666667
NADH dehydrogenase [ubiquinone] iron-sulfur protein 7, mitochondrial OS=Homo sapiens GN=NDUFS7 PE=1 SV=3	NDUS7_HUMAN	24 kDa	3	2	0.666667
O43290-DECOY	O43290-DECOY	?	3	2	0.666667
Plasminogen activator inhibitor 1 RNA-binding protein OS=Homo sapiens GN=SERBP1 PE=1 SV=2	PAIRB_HUMAN	45 kDa	3	2	0.666667
Prohibitin-2 OS=Homo sapiens GN=PHB2 PE=1 SV=2	PHB2_HUMAN	33 kDa	3	2	0.666667
Reticulon-4 OS=Homo sapiens GN=RTN4 PE=1 SV=2	RTN4_HUMAN	130 kDa	3	2	0.666667
Vesicle-associated membrane protein-associated protein A OS=Homo sapiens GN=VAPA PE=1 SV=3	VAPA_HUMAN	28 kDa	3	2	0.666667
Glycogen debranching enzyme OS=Homo sapiens GN=AGL PE=1 SV=3	GDE_HUMAN	175 kDa	53	35	0.660377
Sarcoplasmic/endoplasmic reticulum calcium ATPase 1 OS=Homo sapiens GN=ATP2A1 PE=1 SV=1	AT2A1_HUMAN	110 kDa	213	138	0.647887	0.004
Filamin-C OS=Homo sapiens GN=FLNC PE=1 SV=3	FLNC_HUMAN	291 kDa	399	258	0.646617	0.001
Cluster of Filamin-C OS=Homo sapiens GN=FLNC PE=1 SV=3 (FLNC_HUMAN)	FLNC_HUMAN	291 kDa	400	258	0.645	0.001
Collagen alpha-1(IV) chain OS=Homo sapiens GN=COL4A1 PE=1 SV=3	CO4A1_HUMAN	161 kDa	22	14	0.636364
Obscurin OS=Homo sapiens GN=OBSCN PE=1 SV=3	OBSCN_HUMAN	868 kDa	16	10	0.625
Myosin-4 OS=Homo sapiens GN=MYH4 PE=1 SV=2	MYH4_HUMAN	223 kDa	1231	769	0.624695	0.0001
Myosin-2 OS=Homo sapiens GN=MYH2 PE=1 SV=1	MYH2_HUMAN	223 kDa	2545	1569	0.616503	0.0001
Collagen alpha-2(I) chain OS=Homo sapiens GN=COL1A2 PE=1 SV=7	CO1A2_HUMAN	129 kDa	5	3	0.6
Elongation factor Tu, mitochondrial OS=Homo sapiens GN=TUFM PE=1 SV=2	EFTU_HUMAN	50 kDa	5	3	0.6
Collagen alpha-2(IV) chain OS=Homo sapiens GN=COL4A2 PE=1 SV=4	CO4A2_HUMAN	168 kDa	17	10	0.588235
Myosin-1 OS=Homo sapiens GN=MYH1 PE=1 SV=3	MYH1_HUMAN	223 kDa	2061	1211	0.587579	0.0001
Basement membrane-specific heparan sulfate proteoglycan core protein OS=Homo sapiens GN=HSPG2 PE=1 SV=3	PGBM_HUMAN	469 kDa	49	28	0.571429	0.04
Calcium/calmodulin-dependent protein kinase type II subunit alpha OS=Homo sapiens GN=CAMK2A PE=1 SV=2	KCC2A_HUMAN	54 kDa	7	4	0.571429
Prostate-specific antigen OS=Homo sapiens GN=KLK3 PE=1 SV=2	KLK3_HUMAN	29 kDa	16	9	0.5625
CDGSH iron sulfur domain-containing protein 1 OS=Homo sapiens GN=CISD1 PE=1 SV=1	CISD1_HUMAN	12 kDa	9	5	0.555556
Cluster of Calcium/calmodulin-dependent protein kinase type II subunit delta OS=Homo sapiens GN=CAMK2D PE=1 SV=3 (KCC2D_HUMAN)	KCC2D_HUMAN [2]	56 kDa	11	6	0.545455
Dihydrolipoyllysine-residue succinyltransferase component of 2-oxoglutarate dehydrogenase complex, mitochondrial OS=Homo sapiens GN=DLST PE=1 SV=3	ODO2_HUMAN	49 kDa	11	6	0.545455
Triadin OS=Homo sapiens GN=TRDN PE=1 SV=3	TRDN_HUMAN	82 kDa	11	6	0.545455
Succinate dehydrogenase [ubiquinone] flavoprotein subunit, mitochondrial OS=Homo sapiens GN=SDHA PE=1 SV=2	DHSA_HUMAN	73 kDa	13	7	0.538462
UTP--glucose-1-phosphate uridylyltransferase OS=Homo sapiens GN=UGP2 PE=1 SV=5	UGPA_HUMAN	57 kDa	28	15	0.535714
Keratin, type II cytoskeletal 6A OS=Homo sapiens GN=KRT6A PE=1 SV=3	K2C6A_HUMAN	60 kDa	14	7	0.5
Muscle-related coiled-coil protein OS=Homo sapiens GN=MURC PE=1 SV=2	MURC_HUMAN	42 kDa	8	4	0.5
Apoptosis-inducing factor 1, mitochondrial OS=Homo sapiens GN=AIFM1 PE=1 SV=1	AIFM1_HUMAN	67 kDa	6	3	0.5
P35527-DECOY	P35527-DECOY	?	6	3	0.5
Moesin OS=Homo sapiens GN=MSN PE=1 SV=3	MOES_HUMAN	68 kDa	2	1	0.5
40S ribosomal protein S7 OS=Homo sapiens GN=RPS7 PE=1 SV=1	RS7_HUMAN	22 kDa	2	1	0.5
60S acidic ribosomal protein P0-like OS=Homo sapiens PE=1 SV=1	RLA0L_HUMAN (+1)	34 kDa	2	1	0.5
60S ribosomal protein L18a OS=Homo sapiens GN=RPL18A PE=1 SV=2	RL18A_HUMAN	21 kDa	2	1	0.5
Calpain-1 catalytic subunit OS=Homo sapiens GN=CAPN1 PE=1 SV=1	CAN1_HUMAN	82 kDa	2	1	0.5
Cluster of Moesin OS=Homo sapiens GN=MSN PE=1 SV=3 (MOES_HUMAN)	MOES_HUMAN	68 kDa	2	1	0.5
Electron transfer flavoprotein-ubiquinone oxidoreductase, mitochondrial OS=Homo sapiens GN=ETFDH PE=1 SV=2	ETFD_HUMAN	68 kDa	2	1	0.5
Glutamine and serine-rich protein 1 OS=Homo sapiens GN=QSER1 PE=1 SV=2	QSER1_HUMAN	190 kDa	2	1	0.5
MACRO domain-containing protein 1 OS=Homo sapiens GN=MACROD1 PE=1 SV=2	MACD1_HUMAN	36 kDa	2	1	0.5
Mitochondrial import receptor subunit TOM20 homolog OS=Homo sapiens GN=TOMM20 PE=1 SV=1	TOM20_HUMAN	16 kDa	2	1	0.5
Mitogen-activated protein kinase kinase kinase MLT OS=Homo sapiens GN=MLTK PE=1 SV=2	MLTK_HUMAN	91 kDa	2	1	0.5
Prolyl endopeptidase OS=Homo sapiens GN=PREP PE=1 SV=2	PPCE_HUMAN	81 kDa	2	1	0.5
Proteasome subunit alpha type-5 OS=Homo sapiens GN=PSMA5 PE=1 SV=3	PSA5_HUMAN	26 kDa	2	1	0.5
Protein transport protein Sec61 subunit beta OS=Homo sapiens GN=SEC61B PE=1 SV=2	SC61B_HUMAN	10 kDa	2	1	0.5
Q7L014-DECOY	Q7L014-DECOY	?	2	1	0.5
Serine/threonine-protein kinase PRP4 homolog OS=Homo sapiens GN=PRPF4B PE=1 SV=2	PRP4B_HUMAN	117 kDa	2	1	0.5
Sorting nexin-3 OS=Homo sapiens GN=SNX3 PE=1 SV=3	SNX3_HUMAN	19 kDa	2	1	0.5
Myosin-binding protein C, fast-type OS=Homo sapiens GN=MYBPC2 PE=1 SV=2	MYPC2_HUMAN	128 kDa	24	11	0.458333	0.04
Lamin-A/C OS=Homo sapiens GN=LMNA PE=1 SV=1	LMNA_HUMAN	74 kDa	44	19	0.431818	0.005
Alpha-actinin-3 OS=Homo sapiens GN=ACTN3 PE=1 SV=2	ACTN3_HUMAN	103 kDa	156	67	0.429487	<0.0001
Dihydrolipoyl dehydrogenase, mitochondrial OS=Homo sapiens GN=DLD PE=1 SV=2	DLDH_HUMAN	54 kDa	7	3	0.428571
Laminin subunit beta-2 OS=Homo sapiens GN=LAMB2 PE=1 SV=2	LAMB2_HUMAN	196 kDa	30	12	0.4	0.01
Hexokinase-1 OS=Homo sapiens GN=HK1 PE=1 SV=3	HXK1_HUMAN	102 kDa	5	2	0.4
Lamin-B2 OS=Homo sapiens GN=LMNB2 PE=1 SV=3	LMNB2_HUMAN	68 kDa	5	2	0.4
Serine/threonine-protein phosphatase 2A 65 kDa regulatory subunit A alpha isoform OS=Homo sapiens GN=PPP2R1A PE=1 SV=4	2AAA_HUMAN	65 kDa	5	2	0.4
Adenylosuccinate lyase OS=Homo sapiens GN=ADSL PE=1 SV=2	PUR8_HUMAN	55 kDa	6	2	0.333333
Girdin OS=Homo sapiens GN=CCDC88A PE=1 SV=2	GRDN_HUMAN	216 kDa	6	2	0.333333
Acyl-coenzyme A thioesterase 13 OS=Homo sapiens GN=ACOT13 PE=1 SV=1	ACO13_HUMAN	15 kDa	3	1	0.333333
Cytochrome c oxidase subunit 7C, mitochondrial OS=Homo sapiens GN=COX7C PE=1 SV=1	COX7C_HUMAN	7 kDa	3	1	0.333333
Fatty aldehyde dehydrogenase OS=Homo sapiens GN=ALDH3A2 PE=1 SV=1	AL3A2_HUMAN	55 kDa	3	1	0.333333
Histidine triad nucleotide-binding protein 2, mitochondrial OS=Homo sapiens GN=HINT2 PE=1 SV=1	HINT2_HUMAN	17 kDa	3	1	0.333333
NADH dehydrogenase [ubiquinone] 1 beta subcomplex subunit 10 OS=Homo sapiens GN=NDUFB10 PE=1 SV=3	NDUBA_HUMAN	21 kDa	3	1	0.333333
Nebulin-related-anchoring protein OS=Homo sapiens GN=NRAP PE=2 SV=2	NRAP_HUMAN	197 kDa	3	1	0.333333
Protein NDRG2 OS=Homo sapiens GN=NDRG2 PE=1 SV=2	NDRG2_HUMAN	41 kDa	3	1	0.333333
Spectrin beta chain, erythrocyte OS=Homo sapiens GN=SPTB PE=1 SV=5	SPTB1_HUMAN	246 kDa	3	1	0.333333
Transient receptor potential cation channel subfamily V member 6 OS=Homo sapiens GN=TRPV6 PE=1 SV=2	TRPV6_HUMAN	83 kDa	3	1	0.333333
Up-regulated during skeletal muscle growth protein 5 OS=Homo sapiens GN=USMG5 PE=1 SV=1	USMG5_HUMAN	6 kDa	3	1	0.333333
Dystrophin OS=Homo sapiens GN=DMD PE=1 SV=2	DMD_HUMAN	427 kDa	16	5	0.3125	0.03
Microtubule-associated protein tau OS=Homo sapiens GN=MAPT PE=1 SV=4	TAU_HUMAN	79 kDa	4	1	0.25
Vinculin OS=Homo sapiens GN=VCL PE=1 SV=4	VINC_HUMAN	124 kDa	4	1	0.25
Mitochondrial inner membrane protein OS=Homo sapiens GN=IMMT PE=1 SV=1	IMMT_HUMAN	84 kDa	15	3	0.2	0.007
Transcription elongation factor B polypeptide 2 OS=Homo sapiens GN=TCEB2 PE=1 SV=1	ELOB_HUMAN	13 kDa	5	1	0.2
Q9UPN4-DECOY	Q9UPN4-DECOY	?	7	1	0.142857
Smoothelin-like protein 1 OS=Homo sapiens GN=SMTNL1 PE=2 SV=1	SMTL1_HUMAN	49 kDa	8	1	0.125	0.04
Transitional endoplasmic reticulum ATPase OS=Homo sapiens GN=VCP PE=1 SV=4	TERA_HUMAN	89 kDa	8	1	0.125	0.04
Myosin light chain 5 OS=Homo sapiens GN=MYL5 PE=2 SV=1	MYL5_HUMAN	20 kDa	10	0	0	0.002
Glutathione S-transferase Mu 1 OS=Homo sapiens GN=GSTM1 PE=1 SV=3	GSTM1_HUMAN	26 kDa	8	0	0	0.01
Carnitine O-acetyltransferase OS=Homo sapiens GN=CRAT PE=1 SV=5	CACP_HUMAN	71 kDa	6	0	0	0.04
Ig gamma-2 chain C region OS=Homo sapiens GN=IGHG2 PE=1 SV=2	IGHG2_HUMAN (+1)	36 kDa	5	0	0
Kelch repeat and BTB domain-containing protein 5 OS=Homo sapiens GN=KBTBD5 PE=2 SV=2	KBTB5_HUMAN	69 kDa	5	0	0
Phosphorylase b kinase regulatory subunit beta OS=Homo sapiens GN=PHKB PE=1 SV=3	KPBB_HUMAN	125 kDa	4	0	0
Dystrobrevin alpha OS=Homo sapiens GN=DTNA PE=1 SV=2	DTNA_HUMAN	84 kDa	3	0	0
Cluster of Dystrobrevin alpha OS=Homo sapiens GN=DTNA PE=1 SV=2 (DTNA_HUMAN)	DTNA_HUMAN	84 kDa	3	0	0
Double-stranded RNA-specific adenosine deaminase OS=Homo sapiens GN=ADAR PE=1 SV=3	DSRAD_HUMAN	136 kDa	3	0	0
O95995-DECOY	O95995-DECOY	?	3	0	0
P57740-DECOY	P57740-DECOY	?	3	0	0
Pterin-4-alpha-carbinolamine dehydratase OS=Homo sapiens GN=PCBD1 PE=1 SV=2	PHS_HUMAN	12 kDa	3	0	0
Q9C0B2-DECOY	Q9C0B2-DECOY	?	3	0	0
Spectrin beta chain, brain 4 OS=Homo sapiens GN=SPTBN5 PE=1 SV=1	SPTN5_HUMAN	417 kDa	3	0	0
Stress-induced-phosphoprotein 1 OS=Homo sapiens GN=STIP1 PE=1 SV=1	STIP1_HUMAN	63 kDa	3	0	0
Ubiquitin carboxyl-terminal hydrolase isozyme L1 OS=Homo sapiens GN=UCHL1 PE=1 SV=2	UCHL1_HUMAN	25 kDa	3	0	0
Fructose-1,6-bisphosphatase isozyme 2 OS=Homo sapiens GN=FBP2 PE=1 SV=2	F16P2_HUMAN	37 kDa	2	0	0
Polyadenylate-binding protein 4 OS=Homo sapiens GN=PABPC4 PE=1 SV=1	PABP4_HUMAN	71 kDa	2	0	0
[Protein ADP-ribosylarginine] hydrolase-like protein 1 OS=Homo sapiens GN=ADPRHL1 PE=2 SV=1	ARHL1_HUMAN	40 kDa	2	0	0
Basic leucine zipper and W2 domain-containing protein 2 OS=Homo sapiens GN=BZW2 PE=1 SV=1	BZW2_HUMAN	48 kDa	2	0	0
Beta-1-syntrophin OS=Homo sapiens GN=SNTB1 PE=1 SV=3	SNTB1_HUMAN	58 kDa	2	0	0
Bifunctional purine biosynthesis protein PURH OS=Homo sapiens GN=ATIC PE=1 SV=3	PUR9_HUMAN	65 kDa	2	0	0
Brain protein 44 OS=Homo sapiens GN=BRP44 PE=1 SV=1	BR44_HUMAN	14 kDa	2	0	0
Cluster of Fructose-1,6-bisphosphatase isozyme 2 OS=Homo sapiens GN=FBP2 PE=1 SV=2 (F16P2_HUMAN)	F16P2_HUMAN	37 kDa	2	0	0
Cluster of Polyadenylate-binding protein 4 OS=Homo sapiens GN=PABPC4 PE=1 SV=1 (PABP4_HUMAN)	PABP4_HUMAN	71 kDa	2	0	0
Fibrillin-1 OS=Homo sapiens GN=FBN1 PE=1 SV=2	FBN1_HUMAN	312 kDa	2	0	0
Leiomodin-3 OS=Homo sapiens GN=LMOD3 PE=2 SV=1	LMOD3_HUMAN	65 kDa	2	0	0
Myosin-binding protein H OS=Homo sapiens GN=MYBPH PE=2 SV=4	MYBPH_HUMAN	52 kDa	2	0	0
Phospholipid hydroperoxide glutathione peroxidase, mitochondrial OS=Homo sapiens GN=GPX4 PE=1 SV=3	GPX4_HUMAN	22 kDa	2	0	0
Quinone oxidoreductase OS=Homo sapiens GN=CRYZ PE=1 SV=1	QOR_HUMAN	35 kDa	2	0	0
Ras-related protein Rap-1A OS=Homo sapiens GN=RAP1A PE=1 SV=1	RAP1A_HUMAN (+1)	21 kDa	2	0	0
Retinal dehydrogenase 1 OS=Homo sapiens GN=ALDH1A1 PE=1 SV=2	AL1A1_HUMAN	55 kDa	2	0	0
Sodium/potassium-transporting ATPase subunit alpha-2 OS=Homo sapiens GN=ATP1A2 PE=1 SV=1	AT1A2_HUMAN	112 kDa	2	0	0
T-complex protein 1 subunit beta OS=Homo sapiens GN=CCT2 PE=1 SV=4	TCPB_HUMAN	57 kDa	2	0	0
Vesicle-associated membrane protein 5 OS=Homo sapiens GN=VAMP5 PE=1 SV=1	VAMP5_HUMAN	13 kDa	2	0	0
			21940	21957		77		35
						# with significance
					Fraction:	0.149515

## Sheet: up in aged
Identified Proteins (713)	Accession Number	Molecular Weight	Lane 1	Lane 3	ratio
Myosin light polypeptide 6 OS=Homo sapiens GN=MYL6 PE=1 SV=2	MYL6_HUMAN	17 kDa	0.1	27	270	7.03087	28.6225	13	0.540836
Myozenin-2 OS=Homo sapiens GN=MYOZ2 PE=1 SV=1	MYOZ2_HUMAN	30 kDa	0.1	21	210
Annexin A2 OS=Homo sapiens GN=ANXA2 PE=1 SV=2	ANXA2_HUMAN	39 kDa	0.1	12	120
Calsequestrin-2 OS=Homo sapiens GN=CASQ2 PE=1 SV=2	CASQ2_HUMAN	46 kDa	0.1	11	110
Adenylosuccinate synthetase isozyme 1 OS=Homo sapiens GN=ADSSL1 PE=1 SV=1	PURA1_HUMAN	50 kDa	2	17	8.5
14-3-3 protein eta OS=Homo sapiens GN=YWHAH PE=1 SV=4	1433F_HUMAN	28 kDa	1	8	8
Ig lambda chain C regions OS=Homo sapiens GN=IGLC1 PE=1 SV=1	LAC_HUMAN	11 kDa	1	7	7
PDZ and LIM domain protein 7 OS=Homo sapiens GN=PDLIM7 PE=1 SV=1	PDLI7_HUMAN	50 kDa	1	7	7
Fibrinogen beta chain OS=Homo sapiens GN=FGB PE=1 SV=2	FIBB_HUMAN	56 kDa	1	6	6
Nidogen-2 OS=Homo sapiens GN=NID2 PE=1 SV=3	NID2_HUMAN	151 kDa	1	6	6
Isocitrate dehydrogenase [NADP] cytoplasmic OS=Homo sapiens GN=IDH1 PE=1 SV=2	IDHC_HUMAN	47 kDa	1	6	6
PDZ and LIM domain protein 1 OS=Homo sapiens GN=PDLIM1 PE=1 SV=4	PDLI1_HUMAN	36 kDa	1	6	6
GTP:AMP phosphotransferase mitochondrial OS=Homo sapiens GN=AK3 PE=1 SV=4	KAD3_HUMAN	26 kDa	2	10	5
Cluster of Ubiquitin-conjugating enzyme E2 variant 2 OS=Homo sapiens GN=UBE2V2 PE=1 SV=4 (UB2V2_HUMAN)	UB2V2_HUMAN [2]	16 kDa	1	5	5
GTP-binding nuclear protein Ran OS=Homo sapiens GN=RAN PE=1 SV=3	RAN_HUMAN	24 kDa	1	5	5
Guanine nucleotide-binding protein subunit beta-2-like 1 OS=Homo sapiens GN=GNB2L1 PE=1 SV=3	GBLP_HUMAN	35 kDa	1	5	5
Mitochondrial fission 1 protein OS=Homo sapiens GN=FIS1 PE=1 SV=2	FIS1_HUMAN	17 kDa	1	5	5
Ig mu chain C region OS=Homo sapiens GN=IGHM PE=1 SV=3	IGHM_HUMAN	49 kDa	1	5	5
Poly(rC)-binding protein 2 OS=Homo sapiens GN=PCBP2 PE=1 SV=1	PCBP2_HUMAN	39 kDa	1	5	5
Q96JB1-DECOY	Q96JB1-DECOY	?	1	5	5
Amine oxidase [flavin-containing] B OS=Homo sapiens GN=MAOB PE=1 SV=3	AOFB_HUMAN	59 kDa	2	8	4
Electron transfer flavoprotein subunit beta OS=Homo sapiens GN=ETFB PE=1 SV=3	ETFB_HUMAN	28 kDa	2	8	4
Glutathione S-transferase omega-1 OS=Homo sapiens GN=GSTO1 PE=1 SV=2	GSTO1_HUMAN	28 kDa	2	8	4
Heterogeneous nuclear ribonucleoproteins A2/B1 OS=Homo sapiens GN=HNRNPA2B1 PE=1 SV=2	ROA2_HUMAN	37 kDa	2	8	4
Small muscular protein OS=Homo sapiens GN=SMPX PE=2 SV=3	SMPX_HUMAN	10 kDa	2	8	4
ADP-ribosylation factor 1 OS=Homo sapiens GN=ARF1 PE=1 SV=2	ARF1_HUMAN (+1)	21 kDa	1	4	4
Ubiquitin-conjugating enzyme E2 variant 2 OS=Homo sapiens GN=UBE2V2 PE=1 SV=4	UB2V2_HUMAN	16 kDa	1	4	4
Annexin A5 OS=Homo sapiens GN=ANXA5 PE=1 SV=2	ANXA5_HUMAN	36 kDa	1	4	4
ATP synthase subunit delta, mitochondrial OS=Homo sapiens GN=ATP5D PE=1 SV=2	ATPD_HUMAN	17 kDa	1	4	4
Histone H1.0 OS=Homo sapiens GN=H1F0 PE=1 SV=3	H10_HUMAN	21 kDa	1	4	4
NADH dehydrogenase [ubiquinone] iron-sulfur protein 2, mitochondrial OS=Homo sapiens GN=NDUFS2 PE=1 SV=2	NDUS2_HUMAN	53 kDa	1	4	4
S-formylglutathione hydrolase OS=Homo sapiens GN=ESD PE=1 SV=2	ESTD_HUMAN	31 kDa	1	4	4
Tubulointerstitial nephritis antigen-like OS=Homo sapiens GN=TINAGL1 PE=1 SV=1	TINAL_HUMAN	52 kDa	1	4	4
Ubiquitin-conjugating enzyme E2 variant 1 OS=Homo sapiens GN=UBE2V1 PE=1 SV=2	UB2V1_HUMAN	16 kDa	1	4	4
Delta-1-pyrroline-5-carboxylate dehydrogenase, mitochondrial OS=Homo sapiens GN=ALDH4A1 PE=1 SV=3	AL4A1_HUMAN	62 kDa	1	4	4
Histone H1.2 OS=Homo sapiens GN=HIST1H1C PE=1 SV=2	H12_HUMAN	21 kDa	1	4	4
Ras GTPase-activating protein-binding protein 2 OS=Homo sapiens GN=G3BP2 PE=1 SV=2	G3BP2_HUMAN	54 kDa	1	4	4
Serine/threonine-protein phosphatase PP1-beta catalytic subunit OS=Homo sapiens GN=PPP1CB PE=1 SV=3	PP1B_HUMAN	37 kDa	1	4	4
14-3-3 protein zeta/delta OS=Homo sapiens GN=YWHAZ PE=1 SV=1	1433Z_HUMAN	28 kDa	3	11	3.66667
L-lactate dehydrogenase B chain OS=Homo sapiens GN=LDHB PE=1 SV=2	LDHB_HUMAN	37 kDa	8	28	3.5
Glutathione S-transferase P OS=Homo sapiens GN=GSTP1 PE=1 SV=2	GSTP1_HUMAN	23 kDa	4	14	3.5
ES1 protein homolog, mitochondrial OS=Homo sapiens GN=C21orf33 PE=1 SV=3	ES1_HUMAN	28 kDa	2	7	3.5
Thioredoxin-dependent peroxide reductase, mitochondrial OS=Homo sapiens GN=PRDX3 PE=1 SV=3	PRDX3_HUMAN	28 kDa	2	7	3.5
Cluster of Histone H2A type 1-H OS=Homo sapiens GN=HIST1H2AH PE=1 SV=3 (H2A1H_HUMAN)	H2A1H_HUMAN [7]	14 kDa	6	20	3.33333
Troponin T, slow skeletal muscle OS=Homo sapiens GN=TNNT1 PE=1 SV=4	TNNT1_HUMAN	33 kDa	38	125	3.28947
Histone H3.3 OS=Homo sapiens GN=H3F3A PE=1 SV=2	H33_HUMAN	15 kDa	5	16	3.2
Histone H2A type 1-H OS=Homo sapiens GN=HIST1H2AH PE=1 SV=3	H2A1H_HUMAN (+5)	14 kDa	6	19	3.16667
Histone H2A type 1-C OS=Homo sapiens GN=HIST1H2AC PE=1 SV=3	H2A1C_HUMAN	14 kDa	6	18	3
Lactoylglutathione lyase OS=Homo sapiens GN=GLO1 PE=1 SV=4	LGUL_HUMAN	21 kDa	4	12	3
L-xylulose reductase OS=Homo sapiens GN=DCXR PE=1 SV=2	DCXR_HUMAN	26 kDa	2	6	3
NADH dehydrogenase [ubiquinone] iron-sulfur protein 3, mitochondrial OS=Homo sapiens GN=NDUFS3 PE=1 SV=1	NDUS3_HUMAN	30 kDa	2	6	3
Acyl carrier protein, mitochondrial OS=Homo sapiens GN=NDUFAB1 PE=1 SV=3	ACPM_HUMAN	17 kDa	1	3	3
A-kinase anchor protein 13 OS=Homo sapiens GN=AKAP13 PE=1 SV=2	AKP13_HUMAN	308 kDa	1	3	3
Calmodulin-like protein 5 OS=Homo sapiens GN=CALML5 PE=1 SV=2	CALL5_HUMAN	16 kDa	1	3	3
CD59 glycoprotein OS=Homo sapiens GN=CD59 PE=1 SV=1	CD59_HUMAN	14 kDa	1	3	3
Dihydropyrimidinase-related protein 3 OS=Homo sapiens GN=DPYSL3 PE=1 SV=1	DPYL3_HUMAN	62 kDa	1	3	3
Heat shock protein beta-3 OS=Homo sapiens GN=HSPB3 PE=2 SV=2	HSPB3_HUMAN	17 kDa	1	3	3
Macrophage migration inhibitory factor OS=Homo sapiens GN=MIF PE=1 SV=4	MIF_HUMAN	12 kDa	1	3	3
Mimecan OS=Homo sapiens GN=OGN PE=1 SV=1	MIME_HUMAN	34 kDa	1	3	3
Myopalladin OS=Homo sapiens GN=MYPN PE=1 SV=2	MYPN_HUMAN	145 kDa	1	3	3
NADH dehydrogenase [ubiquinone] 1 beta subcomplex subunit 11, mitochondrial OS=Homo sapiens GN=NDUFB11 PE=1 SV=1	NDUBB_HUMAN	17 kDa	1	3	3
NADH-cytochrome b5 reductase 3 OS=Homo sapiens GN=CYB5R3 PE=1 SV=3	NB5R3_HUMAN	34 kDa	1	3	3
P07951-DECOY	P07951-DECOY	?	1	3	3
Proactivator polypeptide OS=Homo sapiens GN=PSAP PE=1 SV=2	SAP_HUMAN	58 kDa	1	3	3
Proteasome subunit alpha type-7 OS=Homo sapiens GN=PSMA7 PE=1 SV=1	PSA7_HUMAN	28 kDa	1	3	3
Selenoprotein W OS=Homo sapiens GN=SEPW1 PE=2 SV=3	SELW_HUMAN	9 kDa	1	3	3
Vesicle-associated membrane protein 3 OS=Homo sapiens GN=VAMP3 PE=1 SV=3	VAMP3_HUMAN	11 kDa	1	3	3
Cluster of Erlin-1 OS=Homo sapiens GN=ERLIN1 PE=1 SV=1 (ERLN1_HUMAN)	ERLN1_HUMAN	39 kDa	1	3	3
Cluster of Erlin-1 OS=Homo sapiens GN=ERLIN1 PE=1 SV=1 (ERLN1_HUMAN)	ERLN1_HUMAN	39 kDa	1	3	3
Haptoglobin-related protein OS=Homo sapiens GN=HPR PE=1 SV=2	HPTR_HUMAN (+1)	39 kDa	1	3	3
NADH dehydrogenase [ubiquinone] 1 alpha subcomplex subunit 9, mitochondrial OS=Homo sapiens GN=NDUFA9 PE=1 SV=2	NDUA9_HUMAN	43 kDa	1	3	3
Peptidyl-prolyl cis-trans isomerase-like 3 OS=Homo sapiens GN=PPIL3 PE=1 SV=1	PPIL3_HUMAN	18 kDa	1	3	3
Q99996-DECOY	Q99996-DECOY	?	1	3	3
Rho GDP-dissociation inhibitor 1 OS=Homo sapiens GN=ARHGDIA PE=1 SV=3	GDIR1_HUMAN	23 kDa	1	3	3
Phosphatidylethanolamine-binding protein 1 OS=Homo sapiens GN=PEBP1 PE=1 SV=3	PEBP1_HUMAN	21 kDa	15	41	2.73333
Creatine kinase B-type OS=Homo sapiens GN=CKB PE=1 SV=1	KCRB_HUMAN	43 kDa	3	8	2.66667
Cluster of Amine oxidase [flavin-containing] B OS=Homo sapiens GN=MAOB PE=1 SV=3 (AOFB_HUMAN)	AOFB_HUMAN	59 kDa	3	8	2.66667
Histone H2A.V OS=Homo sapiens GN=H2AFV PE=1 SV=3	H2AV_HUMAN (+1)	14 kDa	5	13	2.6
Hemoglobin subunit gamma-1 OS=Homo sapiens GN=HBG1 PE=1 SV=2	HBG1_HUMAN	16 kDa	7	18	2.57143
Protein NipSnap homolog 2 OS=Homo sapiens GN=GBAS PE=1 SV=1	NIPS2_HUMAN	34 kDa	7	18	2.57143
Ferritin heavy chain OS=Homo sapiens GN=FTH1 PE=1 SV=2	FRIH_HUMAN	21 kDa	8	20	2.5
Elongation factor 1-alpha 2 OS=Homo sapiens GN=EEF1A2 PE=1 SV=1	EF1A2_HUMAN	50 kDa	4	10	2.5
Medium-chain specific acyl-CoA dehydrogenase, mitochondrial OS=Homo sapiens GN=ACADM PE=1 SV=1	ACADM_HUMAN	47 kDa	4	10	2.5
40S ribosomal protein S12 OS=Homo sapiens GN=RPS12 PE=1 SV=3	RS12_HUMAN	15 kDa	2	5	2.5
Cluster of ADP-ribosylation factor 1 OS=Homo sapiens GN=ARF1 PE=1 SV=2 (ARF1_HUMAN)	ARF1_HUMAN [3]	21 kDa	2	5	2.5
Collagen alpha-2(VI) chain OS=Homo sapiens GN=COL6A2 PE=1 SV=4	CO6A2_HUMAN	109 kDa	2	5	2.5
Heat shock protein beta-2 OS=Homo sapiens GN=HSPB2 PE=1 SV=2	HSPB2_HUMAN	20 kDa	2	5	2.5
O76041-DECOY	O76041-DECOY	?	2	5	2.5
Peptidyl-prolyl cis-trans isomerase A OS=Homo sapiens GN=PPIA PE=1 SV=2	PPIA_HUMAN	18 kDa	11	27	2.45455
LIM and cysteine-rich domains protein 1 OS=Homo sapiens GN=LMCD1 PE=1 SV=1	LMCD1_HUMAN	41 kDa	12	29	2.41667
Troponin I, slow skeletal muscle OS=Homo sapiens GN=TNNI1 PE=1 SV=3	TNNI1_HUMAN	22 kDa	65	157	2.41538
Protein-L-isoaspartate(D-aspartate) O-methyltransferase OS=Homo sapiens GN=PCMT1 PE=1 SV=3	PIMT_HUMAN	25 kDa	5	12	2.4
Myosin regulatory light chain 2, ventricular/cardiac muscle isoform OS=Homo sapiens GN=MYL2 PE=1 SV=3	MLRV_HUMAN	19 kDa	69	165	2.3913
Citrate synthase, mitochondrial OS=Homo sapiens GN=CS PE=1 SV=2	CISY_HUMAN	52 kDa	6	14	2.33333
F-actin-capping protein subunit beta OS=Homo sapiens GN=CAPZB PE=1 SV=4	CAPZB_HUMAN	31 kDa	6	14	2.33333
NADH dehydrogenase [ubiquinone] 1 alpha subcomplex subunit 12 OS=Homo sapiens GN=NDUFA12 PE=1 SV=1	NDUAC_HUMAN	17 kDa	3	7	2.33333
Troponin C, slow skeletal and cardiac muscles OS=Homo sapiens GN=TNNC1 PE=1 SV=1	TNNC1_HUMAN	18 kDa	33	76	2.30303
Acetyl-CoA acetyltransferase, mitochondrial OS=Homo sapiens GN=ACAT1 PE=1 SV=1	THIL_HUMAN	45 kDa	14	32	2.28571
14-3-3 protein epsilon OS=Homo sapiens GN=YWHAE PE=1 SV=1	1433E_HUMAN	29 kDa	11	25	2.27273
Superoxide dismutase [Mn], mitochondrial OS=Homo sapiens GN=SOD2 PE=1 SV=2	SODM_HUMAN	25 kDa	4	9	2.25
Cofilin-2 OS=Homo sapiens GN=CFL2 PE=1 SV=1	COF2_HUMAN	19 kDa	15	33	2.2
Pyruvate dehydrogenase E1 component subunit beta, mitochondrial OS=Homo sapiens GN=PDHB PE=1 SV=3	ODPB_HUMAN	39 kDa	5	11	2.2
Ubiquitin-conjugating enzyme E2 N OS=Homo sapiens GN=UBE2N PE=1 SV=1	UBE2N_HUMAN	17 kDa	5	11	2.2
Hemoglobin subunit alpha OS=Homo sapiens GN=HBA1 PE=1 SV=2	HBA_HUMAN	15 kDa	47	103	2.19149
Glutathione S-transferase Mu 2 OS=Homo sapiens GN=GSTM2 PE=1 SV=2	GSTM2_HUMAN	26 kDa	12	26	2.16667
Peroxiredoxin-2 OS=Homo sapiens GN=PRDX2 PE=1 SV=5	PRDX2_HUMAN	22 kDa	12	26	2.16667
Protein DJ-1 OS=Homo sapiens GN=PARK7 PE=1 SV=2	PARK7_HUMAN	20 kDa	14	30	2.14286
Hemoglobin subunit beta OS=Homo sapiens GN=HBB PE=1 SV=2	HBB_HUMAN	16 kDa	59	122	2.0678
Histone H4 OS=Homo sapiens GN=HIST1H4A PE=1 SV=2	H4_HUMAN	11 kDa	15	31	2.06667
Galectin-1 OS=Homo sapiens GN=LGALS1 PE=1 SV=2	LEG1_HUMAN	15 kDa	16	33	2.0625
Heat shock protein beta-6 OS=Homo sapiens GN=HSPB6 PE=1 SV=2	HSPB6_HUMAN	17 kDa	20	41	2.05
Cluster of Hemoglobin subunit beta OS=Homo sapiens GN=HBB PE=1 SV=2 (HBB_HUMAN)	HBB_HUMAN [2]	16 kDa	68	136	2
Hemoglobin subunit delta OS=Homo sapiens GN=HBD PE=1 SV=2	HBD_HUMAN	16 kDa	40	80	2
Fatty acid-binding protein, heart OS=Homo sapiens GN=FABP3 PE=1 SV=4	FABPH_HUMAN	15 kDa	17	34	2
Myosin-15 OS=Homo sapiens GN=MYH15 PE=1 SV=5	MYH15_HUMAN	225 kDa	14	28	2
Cluster of Glutathione S-transferase Mu 2 OS=Homo sapiens GN=GSTM2 PE=1 SV=2 (GSTM2_HUMAN)	GSTM2_HUMAN [2]	26 kDa	13	26	2
Cofilin-1 OS=Homo sapiens GN=CFL1 PE=1 SV=3	COF1_HUMAN	19 kDa	10	20	2
Carbonic anhydrase 1 OS=Homo sapiens GN=CA1 PE=1 SV=2	CAH1_HUMAN	29 kDa	7	14	2
Poly(rC)-binding protein 1 OS=Homo sapiens GN=PCBP1 PE=1 SV=2	PCBP1_HUMAN	37 kDa	6	12	2
2-oxoglutarate dehydrogenase, mitochondrial OS=Homo sapiens GN=OGDH PE=1 SV=3	ODO1_HUMAN	116 kDa	5	10	2
Glycerol-3-phosphate dehydrogenase 1-like protein OS=Homo sapiens GN=GPD1L PE=1 SV=1	GPD1L_HUMAN	38 kDa	5	10	2
Translationally-controlled tumor protein OS=Homo sapiens GN=TPT1 PE=1 SV=1	TCTP_HUMAN	20 kDa	5	10	2
NADH dehydrogenase [ubiquinone] 1 alpha subcomplex subunit 6 OS=Homo sapiens GN=NDUFA6 PE=1 SV=2	NDUA6_HUMAN	15 kDa	4	8	2
Pyruvate dehydrogenase E1 component subunit alpha, somatic form, mitochondrial OS=Homo sapiens GN=PDHA1 PE=1 SV=3	ODPA_HUMAN	43 kDa	4	8	2
Succinate dehydrogenase [ubiquinone] iron-sulfur subunit, mitochondrial OS=Homo sapiens GN=SDHB PE=1 SV=3	DHSB_HUMAN	32 kDa	4	8	2
Nucleoside diphosphate kinase B OS=Homo sapiens GN=NME2 PE=1 SV=1	NDKB_HUMAN	17 kDa	3	6	2
Cluster of Nucleoside diphosphate kinase B OS=Homo sapiens GN=NME2 PE=1 SV=1 (NDKB_HUMAN)	NDKB_HUMAN	17 kDa	3	6	2
Isopentenyl-diphosphate Delta-isomerase 2 OS=Homo sapiens GN=IDI2 PE=1 SV=1	IDI2_HUMAN	27 kDa	3	6	2
3-ketoacyl-CoA thiolase, mitochondrial OS=Homo sapiens GN=ACAA2 PE=1 SV=2	THIM_HUMAN	42 kDa	2	4	2
Coiled-coil-helix-coiled-coil-helix domain-containing protein 3, mitochondrial OS=Homo sapiens GN=CHCHD3 PE=1 SV=1	CHCH3_HUMAN	26 kDa	2	4	2
DNA-binding protein A OS=Homo sapiens GN=CSDA PE=1 SV=4	DBPA_HUMAN	40 kDa	2	4	2
Glutathione S-transferase theta-1 OS=Homo sapiens GN=GSTT1 PE=1 SV=4	GSTT1_HUMAN	27 kDa	2	4	2
GTP-binding protein SAR1b OS=Homo sapiens GN=SAR1B PE=1 SV=1	SAR1B_HUMAN	22 kDa	2	4	2
Leucine-rich repeat-containing protein 20 OS=Homo sapiens GN=LRRC20 PE=2 SV=1	LRC20_HUMAN	21 kDa	2	4	2
NEDD8 OS=Homo sapiens GN=NEDD8 PE=1 SV=1	NEDD8_HUMAN	9 kDa	2	4	2
Selenium-binding protein 1 OS=Homo sapiens GN=SELENBP1 PE=1 SV=2	SBP1_HUMAN	52 kDa	2	4	2
Succinyl-CoA ligase [GDP-forming] subunit alpha, mitochondrial OS=Homo sapiens GN=SUCLG1 PE=1 SV=4	SUCA_HUMAN	36 kDa	2	4	2
Myosin light chain 3 OS=Homo sapiens GN=MYL3 PE=1 SV=3	MYL3_HUMAN	22 kDa	80	158	1.975
Myosin light chain 6B OS=Homo sapiens GN=MYL6B PE=1 SV=1	MYL6B_HUMAN	23 kDa	20	39	1.95
ATP synthase subunit O, mitochondrial OS=Homo sapiens GN=ATP5O PE=1 SV=1	ATPO_HUMAN	23 kDa	10	19	1.9
Superoxide dismutase [Cu-Zn] OS=Homo sapiens GN=SOD1 PE=1 SV=2	SODC_HUMAN	16 kDa	9	17	1.88889
14 kDa phosphohistidine phosphatase OS=Homo sapiens GN=PHPT1 PE=1 SV=1	PHP14_HUMAN	14 kDa	8	15	1.875
Cluster of Histone H2B type 1-D OS=Homo sapiens GN=HIST1H2BD PE=1 SV=2 (H2B1D_HUMAN)	H2B1D_HUMAN	14 kDa	13	24	1.84615
Histone H2B type 1-D OS=Homo sapiens GN=HIST1H2BD PE=1 SV=2	H2B1D_HUMAN	14 kDa	12	22	1.83333
Synaptopodin-2 OS=Homo sapiens GN=SYNPO2 PE=1 SV=2	SYNP2_HUMAN	118 kDa	11	20	1.81818
Cytochrome c1, heme protein, mitochondrial OS=Homo sapiens GN=CYC1 PE=1 SV=2	CY1_HUMAN	35 kDa	5	9	1.8
Electron transfer flavoprotein subunit alpha, mitochondrial OS=Homo sapiens GN=ETFA PE=1 SV=1	ETFA_HUMAN	35 kDa	5	9	1.8
Cluster of Isocitrate dehydrogenase [NADP], mitochondrial OS=Homo sapiens GN=IDH2 PE=1 SV=2 (IDHP_HUMAN)	IDHP_HUMAN [2]	51 kDa	53	95	1.79245
Peptidyl-prolyl cis-trans isomerase FKBP1A OS=Homo sapiens GN=FKBP1A PE=1 SV=2	FKB1A_HUMAN	12 kDa	4	7	1.75
Ryanodine receptor 1 OS=Homo sapiens GN=RYR1 PE=1 SV=3	RYR1_HUMAN	565 kDa	4	7	1.75
Isocitrate dehydrogenase [NADP], mitochondrial OS=Homo sapiens GN=IDH2 PE=1 SV=2	IDHP_HUMAN	51 kDa	53	92	1.73585
UPF0366 protein C11orf67 OS=Homo sapiens GN=C11orf67 PE=1 SV=1	CK067_HUMAN	13 kDa	11	19	1.72727
Hydroxyacylglutathione hydrolase, mitochondrial OS=Homo sapiens GN=HAGH PE=1 SV=2	GLO2_HUMAN	34 kDa	7	12	1.71429
Myoglobin OS=Homo sapiens GN=MB PE=1 SV=2	MYG_HUMAN	17 kDa	342	579	1.69298
Cluster of 14-3-3 protein gamma OS=Homo sapiens GN=YWHAG PE=1 SV=2 (1433G_HUMAN)	1433G_HUMAN [4]	28 kDa	28	47	1.67857
Malate dehydrogenase, cytoplasmic OS=Homo sapiens GN=MDH1 PE=1 SV=4	MDHC_HUMAN	36 kDa	28	47	1.67857
Delta(3,5)-Delta(2,4)-dienoyl-CoA isomerase, mitochondrial OS=Homo sapiens GN=ECH1 PE=1 SV=2	ECH1_HUMAN	36 kDa	6	10	1.66667
10 kDa heat shock protein, mitochondrial OS=Homo sapiens GN=HSPE1 PE=1 SV=2	CH10_HUMAN	11 kDa	3	5	1.66667
14-3-3 protein gamma OS=Homo sapiens GN=YWHAG PE=1 SV=2	1433G_HUMAN	28 kDa	23	38	1.65217
PDZ and LIM domain protein 5 OS=Homo sapiens GN=PDLIM5 PE=1 SV=4	PDLI5_HUMAN	64 kDa	58	95	1.63793
Cytochrome c OS=Homo sapiens GN=CYCS PE=1 SV=2	CYC_HUMAN	12 kDa	19	31	1.63158
Serum albumin OS=Homo sapiens GN=ALB PE=1 SV=2	ALBU_HUMAN	69 kDa	105	170	1.61905
Flavin reductase OS=Homo sapiens GN=BLVRB PE=1 SV=3	BLVRB_HUMAN	22 kDa	13	21	1.61538
Carbonic anhydrase 3 OS=Homo sapiens GN=CA3 PE=1 SV=3	CAH3_HUMAN	30 kDa	147	237	1.61224
Vimentin OS=Homo sapiens GN=VIM PE=1 SV=4	VIME_HUMAN	54 kDa	15	24	1.6
Telethonin OS=Homo sapiens GN=TCAP PE=1 SV=1	TELT_HUMAN	19 kDa	7	11	1.57143
Tropomyosin alpha-3 chain OS=Homo sapiens GN=TPM3 PE=1 SV=1	TPM3_HUMAN	33 kDa	214	329	1.53738
Aldose reductase OS=Homo sapiens GN=AKR1B1 PE=1 SV=3	ALDR_HUMAN	36 kDa	14	21	1.5

## Sheet: up in young
Identified Proteins (713)	Accession Number	Molecular Weight	Lane 1	Lane 3	ratio
Acyl-CoA-binding protein OS=Homo sapiens GN=DBI PE=1 SV=2	ACBP_HUMAN	10 kDa	9	6	0.666667	0.421912	0.261507
Adenylosuccinate lyase OS=Homo sapiens GN=ADSL PE=1 SV=2	PUR8_HUMAN	55 kDa	6	2	0.333333
Alpha-actinin-3 OS=Homo sapiens GN=ACTN3 PE=1 SV=2	ACTN3_HUMAN	103 kDa	156	67	0.429487
Apoptosis-inducing factor 1, mitochondrial OS=Homo sapiens GN=AIFM1 PE=1 SV=1	AIFM1_HUMAN	67 kDa	6	3	0.5
Basement membrane-specific heparan sulfate proteoglycan core protein OS=Homo sapiens GN=HSPG2 PE=1 SV=3	PGBM_HUMAN	469 kDa	49	28	0.571429
Calcium/calmodulin-dependent protein kinase type II subunit alpha OS=Homo sapiens GN=CAMK2A PE=1 SV=2	KCC2A_HUMAN	54 kDa	7	4	0.571429
Carnitine O-acetyltransferase OS=Homo sapiens GN=CRAT PE=1 SV=5	CACP_HUMAN	71 kDa	6	0	0
CDGSH iron sulfur domain-containing protein 1 OS=Homo sapiens GN=CISD1 PE=1 SV=1	CISD1_HUMAN	12 kDa	9	5	0.555556
Cluster of Calcium/calmodulin-dependent protein kinase type II subunit delta OS=Homo sapiens GN=CAMK2D PE=1 SV=3 (KCC2D_HUMAN)	KCC2D_HUMAN [2]	56 kDa	11	6	0.545455
Cluster of Dystrobrevin alpha OS=Homo sapiens GN=DTNA PE=1 SV=2 (DTNA_HUMAN)	DTNA_HUMAN	84 kDa	3	0	0
Cluster of Filamin-C OS=Homo sapiens GN=FLNC PE=1 SV=3 (FLNC_HUMAN)	FLNC_HUMAN	291 kDa	400	258	0.645
Cluster of Heat shock protein HSP 90-alpha OS=Homo sapiens GN=HSP90AA1 PE=1 SV=5 (HS90A_HUMAN)	HS90A_HUMAN [2]	85 kDa	38	26	0.684211
Cluster of Pyruvate kinase isozymes M1/M2 OS=Homo sapiens GN=PKM2 PE=1 SV=4 (KPYM_HUMAN)	KPYM_HUMAN	58 kDa	100	76	0.76
Collagen alpha-1(IV) chain OS=Homo sapiens GN=COL4A1 PE=1 SV=3	CO4A1_HUMAN	161 kDa	22	14	0.636364
Collagen alpha-2(IV) chain OS=Homo sapiens GN=COL4A2 PE=1 SV=4	CO4A2_HUMAN	168 kDa	17	10	0.588235
Dihydrolipoyl dehydrogenase, mitochondrial OS=Homo sapiens GN=DLD PE=1 SV=2	DLDH_HUMAN	54 kDa	7	3	0.428571
Dihydrolipoyllysine-residue succinyltransferase component of 2-oxoglutarate dehydrogenase complex, mitochondrial OS=Homo sapiens GN=DLST PE=1 SV=3	ODO2_HUMAN	49 kDa	11	6	0.545455
Double-stranded RNA-specific adenosine deaminase OS=Homo sapiens GN=ADAR PE=1 SV=3	DSRAD_HUMAN	136 kDa	3	0	0
Dystrobrevin alpha OS=Homo sapiens GN=DTNA PE=1 SV=2	DTNA_HUMAN	84 kDa	3	0	0
Dystrophin OS=Homo sapiens GN=DMD PE=1 SV=2	DMD_HUMAN	427 kDa	16	5	0.3125
Elongation factor Tu, mitochondrial OS=Homo sapiens GN=TUFM PE=1 SV=2	EFTU_HUMAN	50 kDa	5	3	0.6
Filamin-C OS=Homo sapiens GN=FLNC PE=1 SV=3	FLNC_HUMAN	291 kDa	399	258	0.646617
Gelsolin OS=Homo sapiens GN=GSN PE=1 SV=1	GELS_HUMAN	86 kDa	9	6	0.666667
Girdin OS=Homo sapiens GN=CCDC88A PE=1 SV=2	GRDN_HUMAN	216 kDa	6	2	0.333333
Glutathione S-transferase Mu 1 OS=Homo sapiens GN=GSTM1 PE=1 SV=3	GSTM1_HUMAN	26 kDa	8	0	0
Glycogen debranching enzyme OS=Homo sapiens GN=AGL PE=1 SV=3	GDE_HUMAN	175 kDa	53	35	0.660377
Heat shock protein HSP 90-alpha OS=Homo sapiens GN=HSP90AA1 PE=1 SV=5	HS90A_HUMAN	85 kDa	26	19	0.730769
Heat shock protein HSP 90-beta OS=Homo sapiens GN=HSP90AB1 PE=1 SV=4	HS90B_HUMAN	83 kDa	24	18	0.75
Hexokinase-1 OS=Homo sapiens GN=HK1 PE=1 SV=3	HXK1_HUMAN	102 kDa	5	2	0.4
Ig gamma-2 chain C region OS=Homo sapiens GN=IGHG2 PE=1 SV=2	IGHG2_HUMAN (+1)	36 kDa	5	0	0
Kelch repeat and BTB domain-containing protein 5 OS=Homo sapiens GN=KBTBD5 PE=2 SV=2	KBTB5_HUMAN	69 kDa	5	0	0
Keratin, type II cytoskeletal 6A OS=Homo sapiens GN=KRT6A PE=1 SV=3	K2C6A_HUMAN	60 kDa	14	7	0.5
Lamin-A/C OS=Homo sapiens GN=LMNA PE=1 SV=1	LMNA_HUMAN	74 kDa	44	19	0.431818
Lamin-B2 OS=Homo sapiens GN=LMNB2 PE=1 SV=3	LMNB2_HUMAN	68 kDa	5	2	0.4
Laminin subunit beta-2 OS=Homo sapiens GN=LAMB2 PE=1 SV=2	LAMB2_HUMAN	196 kDa	30	12	0.4
Laminin subunit gamma-1 OS=Homo sapiens GN=LAMC1 PE=1 SV=3	LAMC1_HUMAN	178 kDa	25	17	0.68
Microtubule-associated protein tau OS=Homo sapiens GN=MAPT PE=1 SV=4	TAU_HUMAN	79 kDa	4	1	0.25
Mitochondrial inner membrane protein OS=Homo sapiens GN=IMMT PE=1 SV=1	IMMT_HUMAN	84 kDa	15	3	0.2
Muscle-related coiled-coil protein OS=Homo sapiens GN=MURC PE=1 SV=2	MURC_HUMAN	42 kDa	8	4	0.5
Myosin light chain 5 OS=Homo sapiens GN=MYL5 PE=2 SV=1	MYL5_HUMAN	20 kDa	10	0	0
Myosin-1 OS=Homo sapiens GN=MYH1 PE=1 SV=3	MYH1_HUMAN	223 kDa	2061	1211	0.587579
Myosin-13 OS=Homo sapiens GN=MYH13 PE=1 SV=1	MYH13_HUMAN	224 kDa	501	392	0.782435
Myosin-2 OS=Homo sapiens GN=MYH2 PE=1 SV=1	MYH2_HUMAN	223 kDa	2545	1569	0.616503
Myosin-3 OS=Homo sapiens GN=MYH3 PE=1 SV=3	MYH3_HUMAN	224 kDa	687	505	0.73508
Myosin-4 OS=Homo sapiens GN=MYH4 PE=1 SV=2	MYH4_HUMAN	223 kDa	1231	769	0.624695
Myosin-8 OS=Homo sapiens GN=MYH8 PE=1 SV=3	MYH8_HUMAN	223 kDa	1096	760	0.693431
Myosin-binding protein C, fast-type OS=Homo sapiens GN=MYBPC2 PE=1 SV=2	MYPC2_HUMAN	128 kDa	24	11	0.458333
Obscurin OS=Homo sapiens GN=OBSCN PE=1 SV=3	OBSCN_HUMAN	868 kDa	16	10	0.625
Phosphorylase b kinase regulatory subunit beta OS=Homo sapiens GN=PHKB PE=1 SV=3	KPBB_HUMAN	125 kDa	4	0	0
Prostate-specific antigen OS=Homo sapiens GN=KLK3 PE=1 SV=2	KLK3_HUMAN	29 kDa	16	9	0.5625
Pterin-4-alpha-carbinolamine dehydratase OS=Homo sapiens GN=PCBD1 PE=1 SV=2	PHS_HUMAN	12 kDa	3	0	0
Sarcoplasmic/endoplasmic reticulum calcium ATPase 1 OS=Homo sapiens GN=ATP2A1 PE=1 SV=1	AT2A1_HUMAN	110 kDa	213	138	0.647887
Serine/threonine-protein phosphatase 2A 65 kDa regulatory subunit A alpha isoform OS=Homo sapiens GN=PPP2R1A PE=1 SV=4	2AAA_HUMAN	65 kDa	5	2	0.4
Smoothelin-like protein 1 OS=Homo sapiens GN=SMTNL1 PE=2 SV=1	SMTL1_HUMAN	49 kDa	8	1	0.125
Spectrin beta chain, brain 4 OS=Homo sapiens GN=SPTBN5 PE=1 SV=1	SPTN5_HUMAN	417 kDa	3	0	0
Stress-70 protein, mitochondrial OS=Homo sapiens GN=HSPA9 PE=1 SV=2	GRP75_HUMAN	74 kDa	9	6	0.666667
Stress-induced-phosphoprotein 1 OS=Homo sapiens GN=STIP1 PE=1 SV=1	STIP1_HUMAN	63 kDa	3	0	0
Succinate dehydrogenase [ubiquinone] flavoprotein subunit, mitochondrial OS=Homo sapiens GN=SDHA PE=1 SV=2	DHSA_HUMAN	73 kDa	13	7	0.538462
Synemin OS=Homo sapiens GN=SYNM PE=1 SV=2	SYNEM_HUMAN	173 kDa	32	25	0.78125
Transcription elongation factor B polypeptide 2 OS=Homo sapiens GN=TCEB2 PE=1 SV=1	ELOB_HUMAN	13 kDa	5	1	0.2
Transitional endoplasmic reticulum ATPase OS=Homo sapiens GN=VCP PE=1 SV=4	TERA_HUMAN	89 kDa	8	1	0.125
Triadin OS=Homo sapiens GN=TRDN PE=1 SV=3	TRDN_HUMAN	82 kDa	11	6	0.545455
Ubiquitin carboxyl-terminal hydrolase isozyme L1 OS=Homo sapiens GN=UCHL1 PE=1 SV=2	UCHL1_HUMAN	25 kDa	3	0	0
UTP--glucose-1-phosphate uridylyltransferase OS=Homo sapiens GN=UGP2 PE=1 SV=5	UGPA_HUMAN	57 kDa	28	15	0.535714
Vinculin OS=Homo sapiens GN=VCL PE=1 SV=4	VINC_HUMAN	124 kDa	4	1	0.25
